# Supplementary material for: Copper-catalyzed regioselective synthesis of furan via tandem cycloaddition of ketone with an unsaturated carboxylic acid under air
Source: Royal Society of Chemistry journal article supplement (doi:10.1039/c4ob01320d), 2014-10-20
Supplement: c4ob01320d1.pdf [file c4ob01320d1.pdf]

## **SUPPORTING INFORMATION**

### **Copper-catalyzed regioselective synthesis of furan *via* tandem cycloaddition of ketone with unsaturated carboxylic acid under air**

**Monoranjan Ghosh, Subhajit Mishra, Kamarul Monir, Alakananda Hajra\***

*Department of Chemistry, Visva-Bharati (A Central University), Santiniketan 731235, India*

*Tel./Fax: +913463 261526; E-mail: [alakananda.hajra@visva-bharati.ac.in](mailto:alakananda.hajra@visva-bharati.ac.in)*

| <b>Contents:</b>                                  | <b>Page No.</b> |
|---------------------------------------------------|-----------------|
| General                                           | S2              |
| NMR spectra for the synthesized Furan derivatives | S3-S40          |

## 1. General Information:

$^1\text{H}$  NMR spectra were determined on 500 MHz, 400 MHz & 300 MHz spectrometer as solutions in  $\text{CDCl}_3$ . Chemical shifts are expressed in parts per million ( $\delta$ ) and are referenced to tetramethylsilane (TMS) as internal standard and the signals were reported as s (singlet), d (doublet), t (triplet), dd (double doublet), m (multiplet) and coupling constants  $J$  were given in Hz.  $^{13}\text{C}$  NMR spectra were recorded at 125 MHz, 100 MHz & 75 MHz in  $\text{CDCl}_3$ . TLC was done on TLC Silica gel 60 F<sub>254</sub> coated on aluminium sheets (Merck). Silica gel (60-120 mesh) was used for column chromatography. Petroleum ether refers to the fraction boiling in the range of 60-80 °C unless otherwise mentioned. All solvents were dried and distilled before use. Commercially available substrates were freshly distilled before the reaction. Solvents, reagents and chemicals were purchased from Aldrich, Merck, Himedia, and Spectrochem. All reactions involving moisture sensitive reactants were executed using oven dried glassware.

## 2. NMR spectra for the synthesized Furan derivatives:

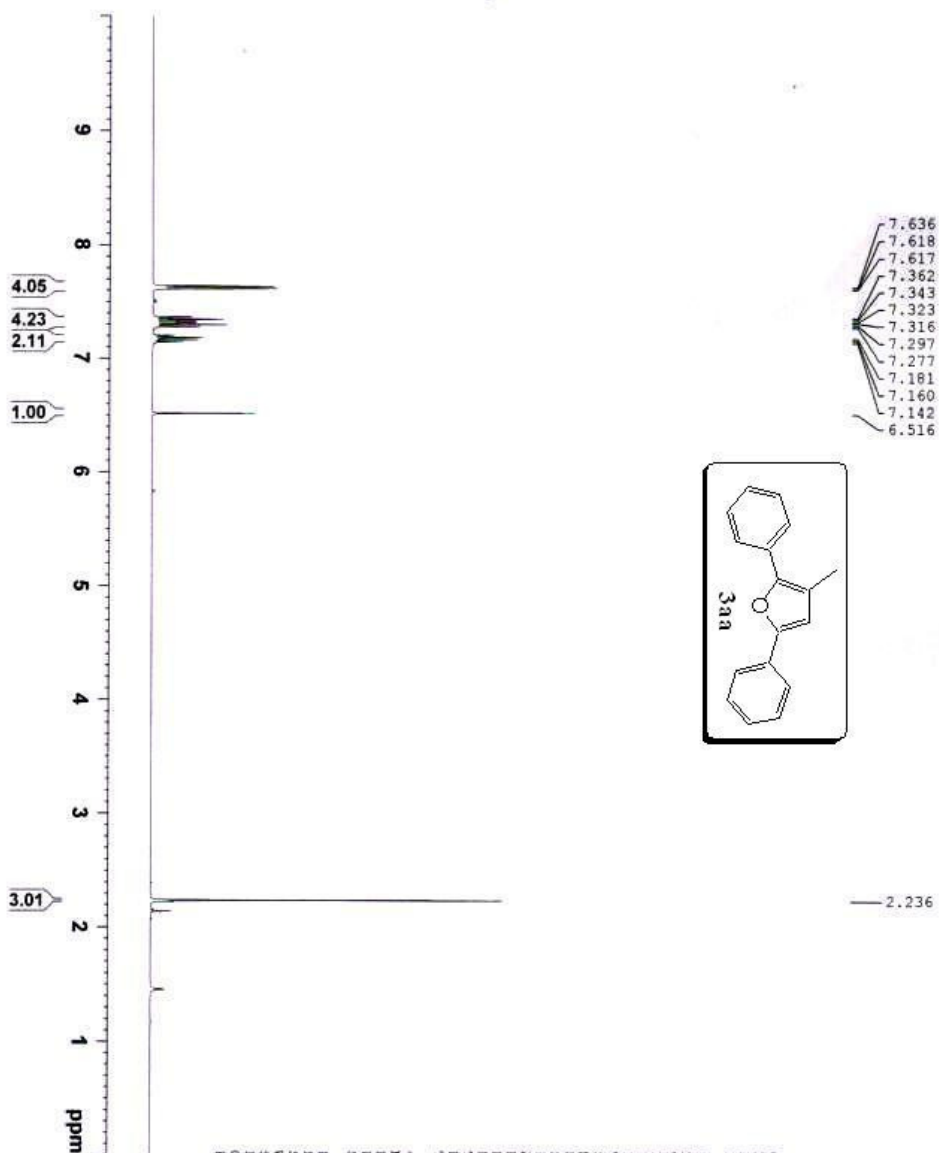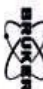

Current Data Parameters  
NAME Dr. A HAJRA.1  
EXPNO 263  
PROCNO 1

F2 - Acquisition Parameters

Date\_ 20131009  
Time 10.47  
INSTRUM spect  
PROBHD 5 mm PABO BB/  
PULPROG zgpg30  
TD 32768  
SOLVENT CDCl3  
NS 24  
DS 2  
SWH 8223.685 Hz  
FIDRES 0.250967 Hz  
AQ 1.992344 sec  
RG 4096  
DE 60.800 usec  
TE 294.9 K  
D1 1.0000000 sec  
TDO 1

===== CHANNEL f1 =====

NUC1 1H  
P1 14.75 usec  
PL1 11.9943909 W  
SFO1 400.152711 MHz

F2 - Processing parameters

SI 16384  
SF 400.1500558 MHz  
WDW EM  
SSB 0  
LB 0.30 Hz  
GB 0  
PC 1.00

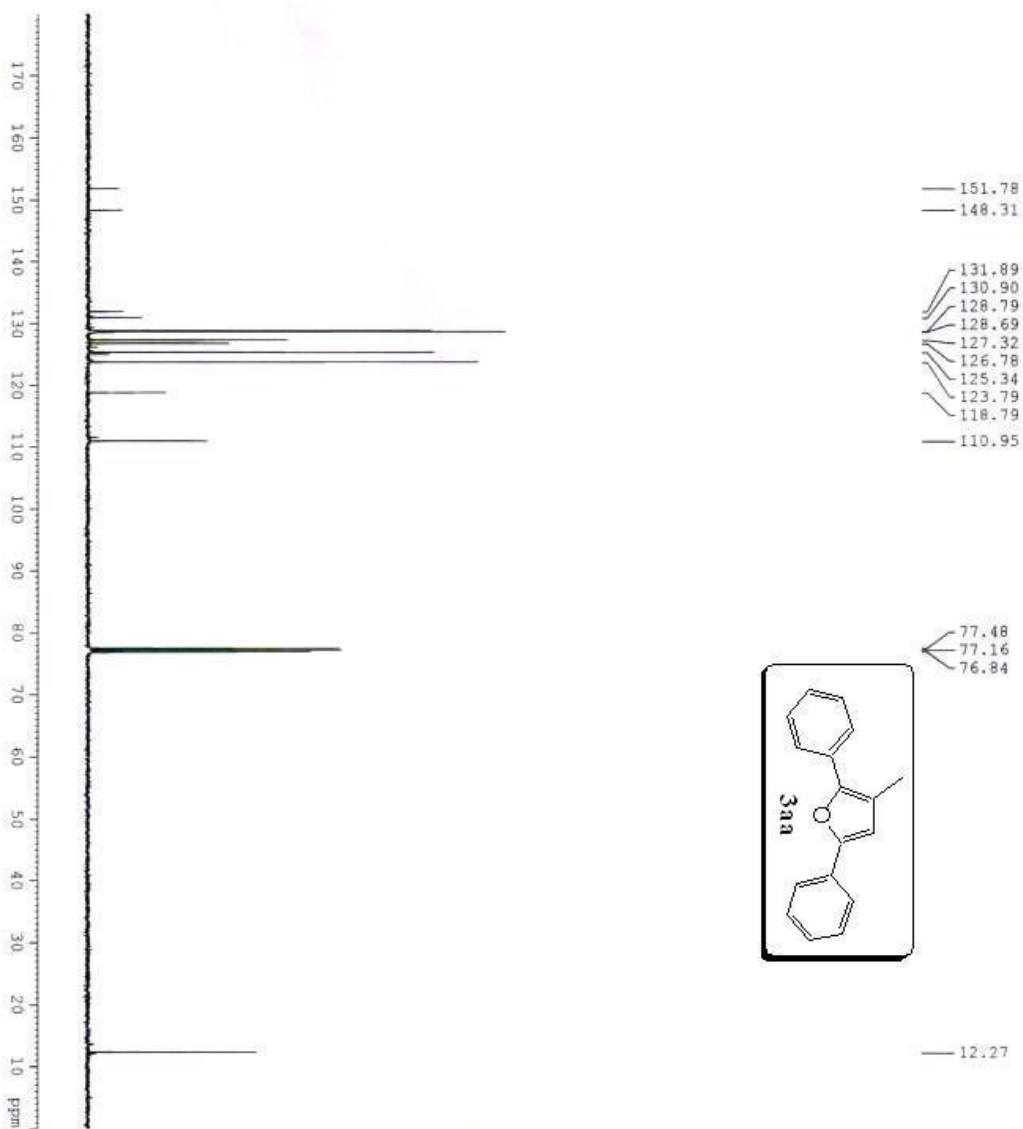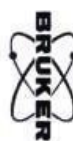

Current Data Parameters  
NAME: Dr. A. HANNA 1  
EXPNO: 264  
PROCNO: 3

F2 - Acquisition Parameters  
Date\_ : 2011.10.29  
Time : 10.59  
INSTRUM : spect  
PROBHD : 5 mm PABBO BB/  
PULPROG : zgpg30  
TD : 32768  
SOLVENT : CDCl3  
DS : 4  
SWH : 24038.461 Hz  
FIDRES : 0.73396 Hz  
AQ : 0.6816244 sec  
RG : 62.69  
RG2 : 20.800 usec  
DE : 29.50 usec  
TE : 300.2 K  
D1 : 2.00000000 sec  
D11 : 0.03000000 sec  
TD0 : 1

===== CHANNEL f1 =====  
NUC1 : 13C  
P1 : 12.50 usec  
PL1 : 54.00000000 W  
SFO1 : 100.6278588 MHz

===== CHANNEL f2 =====  
CPDPRG2 : waltz16  
NUC2 : 1H  
P2 : 12.50 usec  
PL2 : 0.00000000 W  
PL12 : 0.40792929 W  
PL13 : 0.26187081 W  
SFO2 : 400.1516006 MHz

F2 - Processing parameters  
SI : 32768  
SF : 100.6177660 MHz  
WDW : EM  
SSB : 0  
LB : 1.00 Hz  
GB : 0  
PC : 1.40

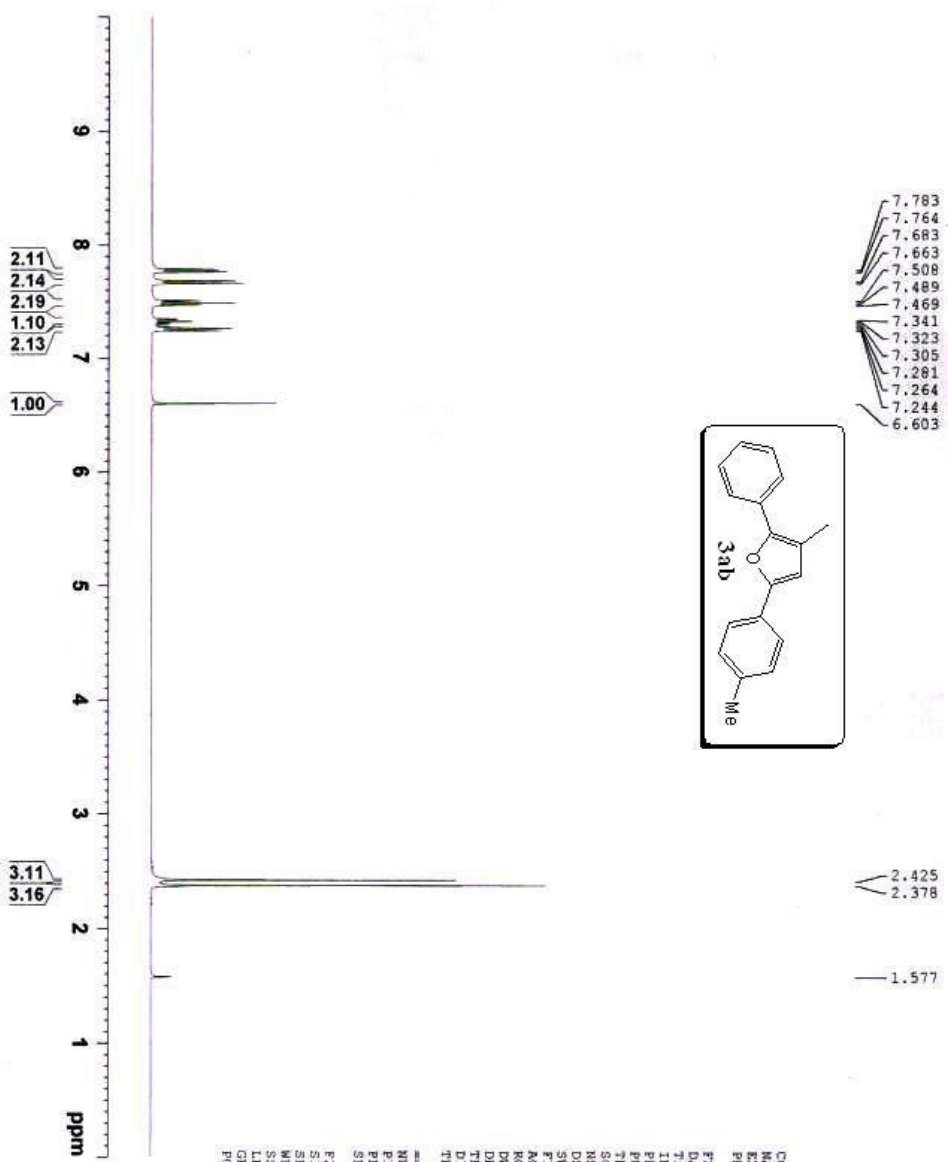

**Current Data Parameters**  
NAME: Dr. A. HAJRA  
EXPNO: 922  
PROCNO: 1

**F2 - Acquisition Parameters**  
Date\_ Time: 2010815  
Time: 10.48  
INSTRUM: spect  
PROBHD: 5 mm PABBO BB/  
PULPROG: zg30  
TD: 32768  
SOLVENT: CDCl3  
NS: 24  
DS: 2  
SWH: 8223.685 Hz  
FIDRES: 0.333551 Hz  
AQ: 1.992344 sec  
RG: 47.25  
DW: 60.800 usec  
DE: 6.50 usec  
TE: 297.4 K  
D1: 1.00000000 sec  
TDO: 1

**===== CHANNEL f1 =====**  
NUC1: 1H  
P1: 14.73 usec  
PL1: 11.99499989 W  
SFO1: 400.1524711 MHz

**F2 - Processing parameters**  
SI: 16384  
SF: 400.1500000 MHz  
WDW: EM  
SSB: 0  
LB: 0.30 Hz  
GB: 0  
PC: 1.00

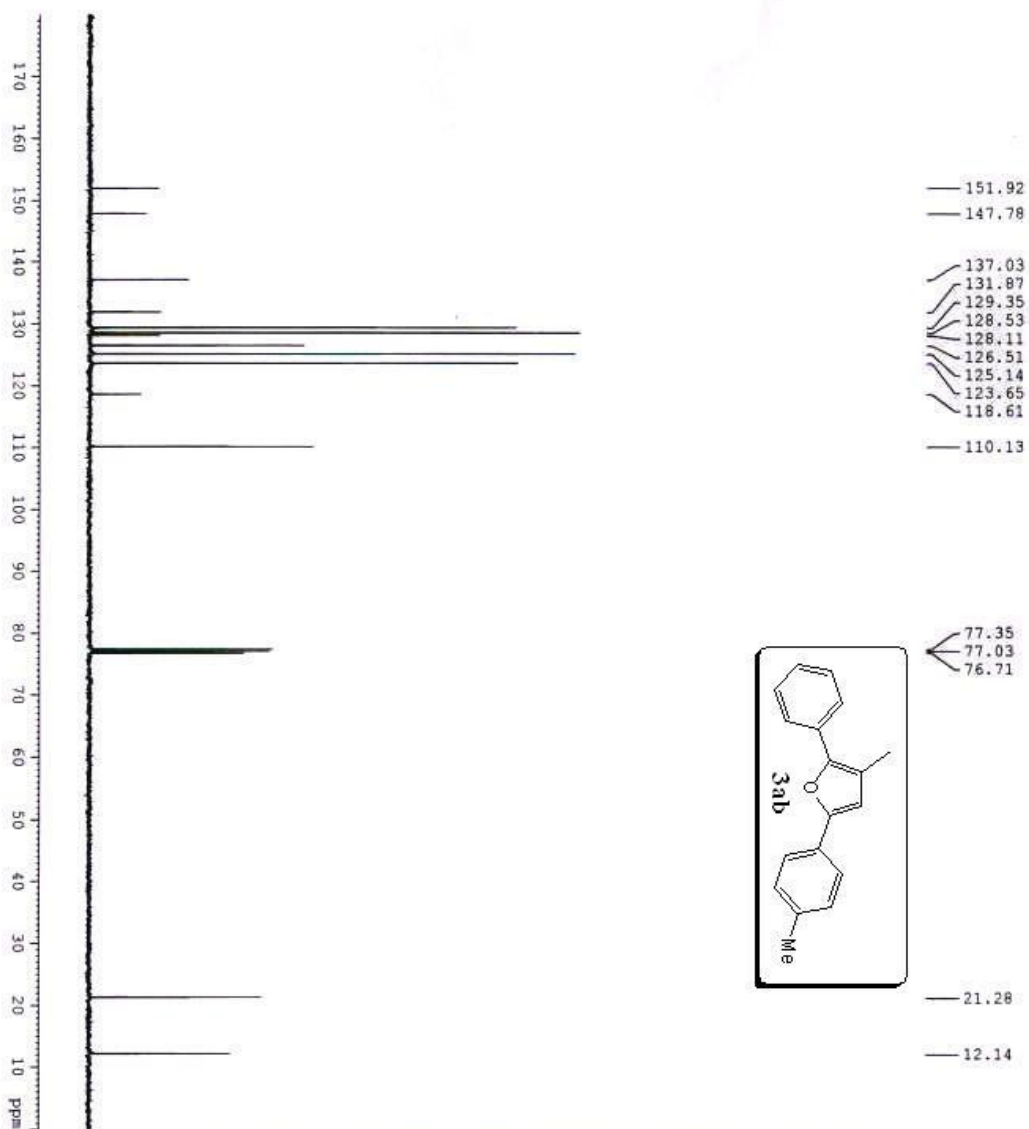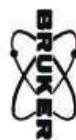

Current Data Parameters  
NAME Dr. A. HADPA  
EXPNO 923  
PROCNO 1  
F2 - Acquisition Parameters  
Date\_ 20130615  
Time 10.58  
INSTRUM spect  
PROBHD 5 mm PABBO BB/  
PULPROG zgpg30  
TD 32768  
SOLVENT CDCl3  
NS 160  
DS 2  
SWH 24038.461 Hz  
FIDRES 0.131596 Hz  
AQ 0.6816244 sec  
RG 47.25  
WM 20.860 umsec  
TE 298.2 K  
DE 2.00000000 sec  
D11 0.01000000 sec  
T00 1

===== CHANNEL f1 =====  
NUC1 13C  
P1 11.50 umsec  
PL1 0.00000000 W  
SFO1 100.6278588 MHz

===== CHANNEL f2 =====  
NAME2 waitf16  
NUC2 1H  
PCPD2 80.00 umsec  
PLM2 13.00000000 W  
PLM12 0.40792999 W  
PLM13 0.26307001 W  
SFO2 400.1516006 MHz

F2 - Processing parameters  
SI 32768  
SF 100.6178026 MHz  
WDW EN  
SSB 0  
LB 1.00 Hz  
GB 0  
EC 1.40

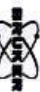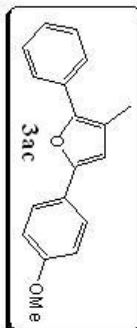

7.635  
7.632  
7.628  
7.614  
7.611  
7.585  
7.580  
7.568  
7.563  
7.369  
7.350  
7.330  
7.200  
7.183  
6.869  
6.864  
6.852  
6.847  
6.407

3.768

2.248

Current Data Parameters  
NAME Dr. A HADPA 1  
EXPNO 180  
PROCNO 1

F2 - Acquisition Parameters  
Date\_ 20100921  
Time 18.37

INSTRUM spect  
PROBHD 5 mm PABBO BB/  
PULPROG zg30  
TD 32768  
SOLVENT CDCl3  
NS 32  
DS 2

SWH 8223.685 Hz  
FIDRES 0.250967 Hz  
AQ 1.993444 sec  
RG 655  
DE 60.800 usec  
TE 296.6 K  
D1 1.00000000 sec  
TD0 1

NUC1 1H  
P1 14.75 usec  
PL1 0.00 dB  
PC1 11.99439063 W  
SFO1 400.1524711 MHz

F2 - Processing parameters  
SI 16384  
SF 400.1500392 MHz  
WDW EM  
SSB 0  
LB 0.30 Hz  
GB 0  
PC 1.00

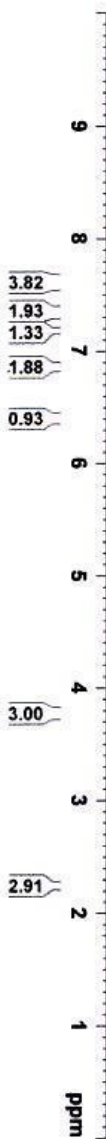

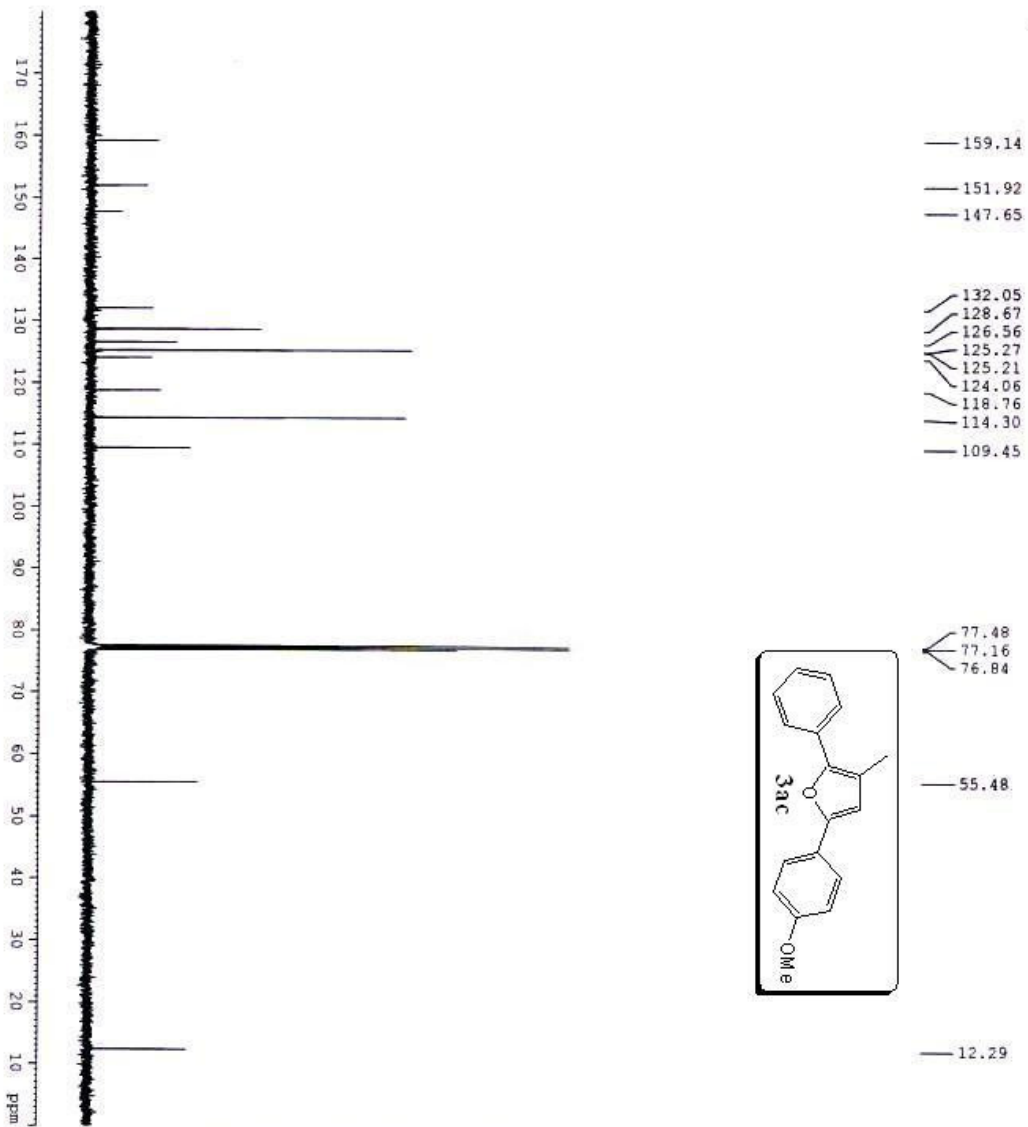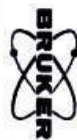

Current Data Parameters  
NAME: 3ac  
EXPNO: 1  
PROCNO: 1

F2 - Acquisition Parameters  
Date\_: 20130921  
Time: 20.39

INSTRUM: spect  
PROBHD: 5 mm BBOH-1H/

PULPROG: zgpg30  
TO: 31768

SOLVENT: CDCl3  
NS: 800

DS: 2  
SWH: 24038.442 Hz

FIDRES: 0.21339 Hz  
AQ: 0.616244 sec

RG: 17.66  
DE: 297.9 K

TE: 5.50 usec  
TD: 1.0000000 sec

D11: 0.0300000 sec  
TD0: 1

===== CHANNEL f1 =====  
NUC1: 13C  
P1: 8.40 usec  
PL1: 0.0000000 dB

===== CHANNEL f2 =====  
NUC2: 1H  
P2: 12.00 usec  
PL2: 0.0000000 dB

===== CHANNEL f3 =====  
NUC3: 1H  
P3: 12.00 usec  
PL3: 0.0000000 dB

===== CHANNEL f4 =====  
NUC4: 1H  
P4: 12.00 usec  
PL4: 0.0000000 dB

===== CHANNEL f5 =====  
NUC5: 1H  
P5: 12.00 usec  
PL5: 0.0000000 dB

===== CHANNEL f6 =====  
NUC6: 1H  
P6: 12.00 usec  
PL6: 0.0000000 dB

===== CHANNEL f7 =====  
NUC7: 1H  
P7: 12.00 usec  
PL7: 0.0000000 dB

===== CHANNEL f8 =====  
NUC8: 1H  
P8: 12.00 usec  
PL8: 0.0000000 dB

===== CHANNEL f9 =====  
NUC9: 1H  
P9: 12.00 usec  
PL9: 0.0000000 dB

===== CHANNEL f10 =====  
NUC10: 1H  
P10: 12.00 usec  
PL10: 0.0000000 dB

===== CHANNEL f11 =====  
NUC11: 1H  
P11: 12.00 usec  
PL11: 0.0000000 dB

===== CHANNEL f12 =====  
NUC12: 1H  
P12: 12.00 usec  
PL12: 0.0000000 dB

===== CHANNEL f13 =====  
NUC13: 1H  
P13: 12.00 usec  
PL13: 0.0000000 dB

===== CHANNEL f14 =====  
NUC14: 1H  
P14: 12.00 usec  
PL14: 0.0000000 dB

===== CHANNEL f15 =====  
NUC15: 1H  
P15: 12.00 usec  
PL15: 0.0000000 dB

===== CHANNEL f16 =====  
NUC16: 1H  
P16: 12.00 usec  
PL16: 0.0000000 dB

===== CHANNEL f17 =====  
NUC17: 1H  
P17: 12.00 usec  
PL17: 0.0000000 dB



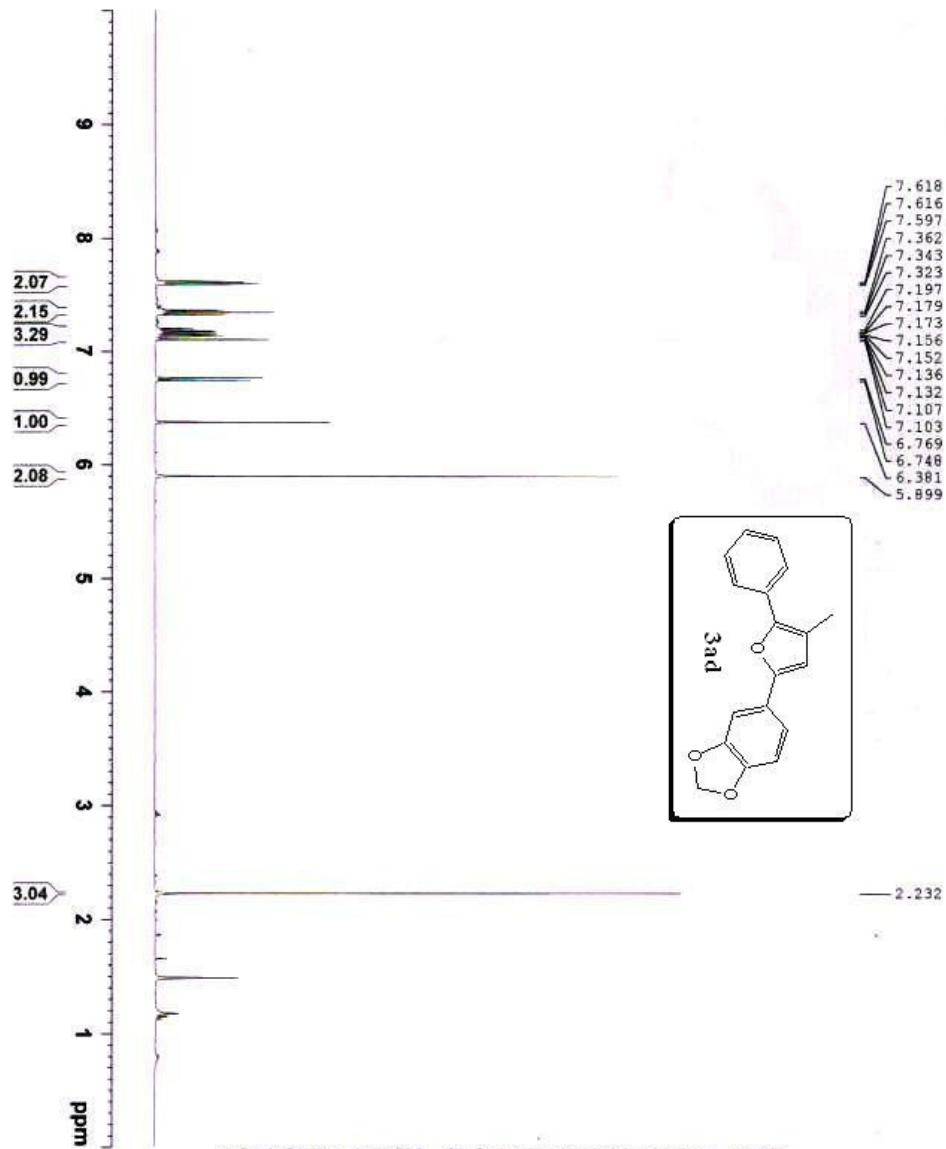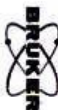

Current Data Parameters  
NAME Dr. A. HADPA 1  
EXPNO 204  
PROCNO 1

F2 - Acquisition Parameters  
Date\_ 20130926  
Time 11.57  
INSTRUM spect  
PROBHD 5 mm PABBO BB/  
PULPROG zg30  
TD 32768  
SOLVENT CDCl3  
NS 24  
DS 2  
SWH 8223.681 Hz  
FIDRES 0.250967 Hz  
AQ 1.9923444 sec  
RG 93.46  
PC 60.800 usec  
DE 6.50 usec  
TE 296.2 K  
D1 1.00000000 sec  
TDO 1

===== CHANNEL f1 =====  
NUC1 1H  
P1 14.75 usec  
PLW1 11.9949989 W  
SFO1 400.1524711 MHz

F2 - Processing parameters  
SI 16384  
SF 400.1500435 MHz  
WDW EM  
SSB 0  
LB 0.30 Hz  
GB 0  
PC 1.00

151.66  
148.13  
147.78  
147.08  
131.90  
128.68  
126.66  
125.44  
125.22  
118.77  
117.71  
109.89  
108.77  
104.59  
101.26

77.48  
77.16  
76.84

12.26

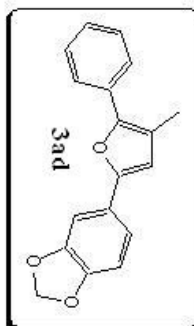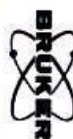

Current Data Parameters  
NAME: 3ad  
EXPNO: 1  
PROCNO: 1

F2 - Acquisition Parameters  
Date\_: 20190526  
Time: 12.29

PROBHD: 5 mm PABBO  
PULPROG: zgpg30  
TD: 32768  
SOLVENT: CDCl3  
NS: 400  
DS: 2

SWH: 24028.462 Hz  
FIDRES: 0.0001842 Hz  
AQ: 0.661244 sec  
RG: 81.25  
DM: 20.800 usec  
DE: 6.50 usec  
TE: 297.2 K  
D1: 2.00000000 sec  
D11: 0.05000000 sec  
TDO: 1

CHANNEL F1  
NUC1: 13C  
P1: 6.90 usec  
PL1: 54.00000000 W  
SFO1: 100.6270558 MHz

CHANNEL F2  
NUC2: 1H  
P2: 18.00 usec  
PL2: 0.00000000 W  
SFO2: 400.1514006 MHz

F2 - Processing parameters  
SI: 32768  
SF: 120.6117851 MHz  
WDW: EM  
SSB: 0  
LB: 1.00 Hz  
GB: 0  
PC: 1.40

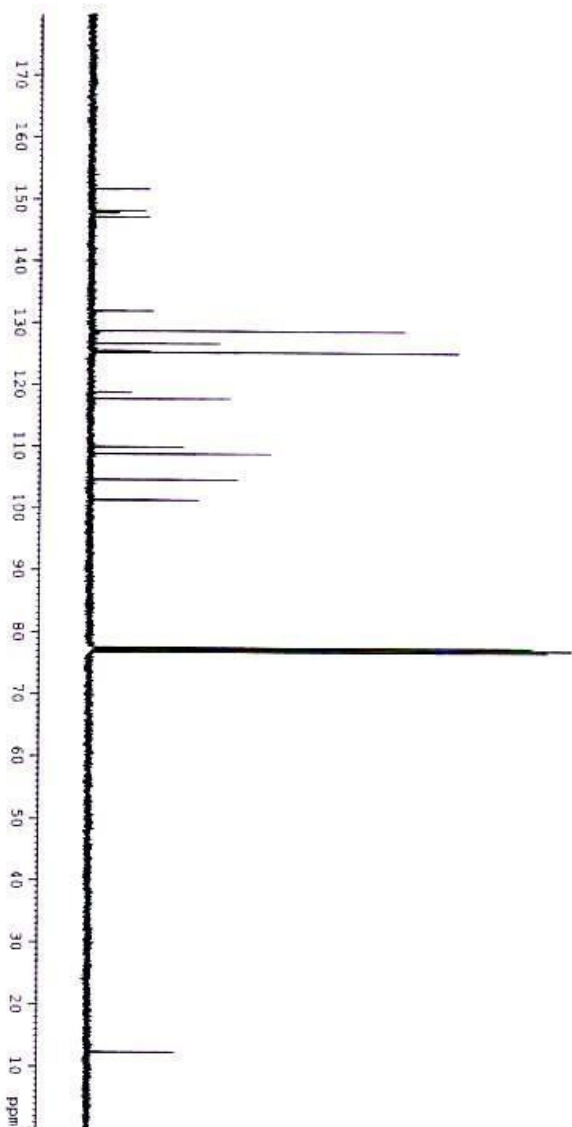

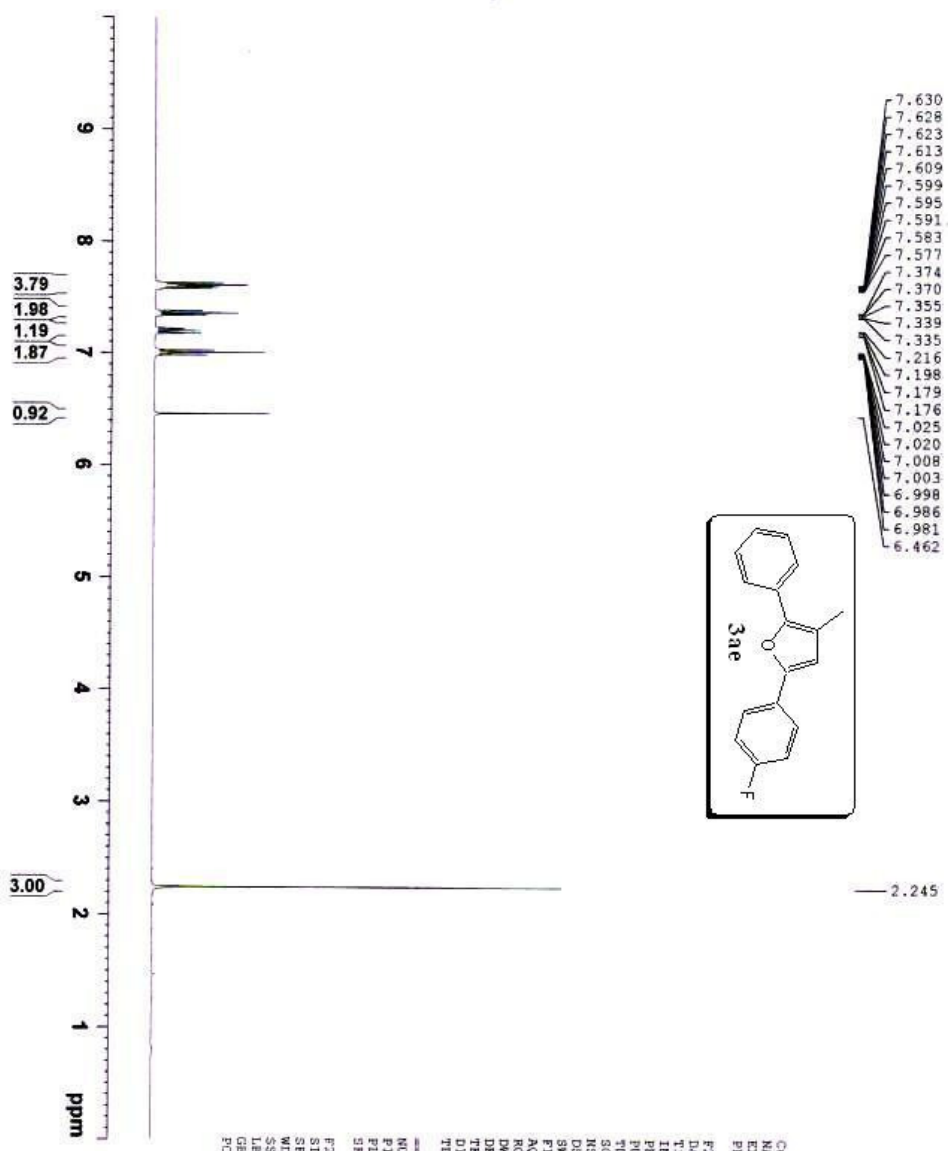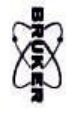

Current Data Parameters  
NAME DE. A HAJRA  
EXNO 985  
PROCNO 1

F2 - Acquisition Parameters  
Date\_ 20130825  
Time 13.17  
INSTRUM spect  
PROBHD 5 mm PABO BB/  
PULPROG zg30  
TD 32768  
SOLVENT CDCl3  
NS 16  
DS 2  
SWH 8223.685 Hz  
FIDRES 0.000246 Hz  
AQ 1.952346 sec  
RG 93.44  
BW 60.800 usec  
DE 6.50 usec  
TE 296.7 K  
D1 1.00000000 sec  
TD0 1

===== CHANNEL f1 =====  
NUC1 1H  
P1 14.70 usec  
PL1 11.9446083  
SFO1 400.1524711 MHz

F2 - Processing parameters  
SI 16394  
SF 400.1500424 MHz  
WDW EM  
SSB 0  
LB 0.30 Hz  
GB 0  
PC 1.00

163.45  
160.99  
150.99  
148.35  
131.80  
128.72  
127.29  
126.87  
125.56  
125.48  
125.35  
118.80  
115.95  
115.73  
110.60

77.48  
77.16  
76.85

12.23

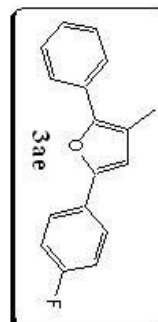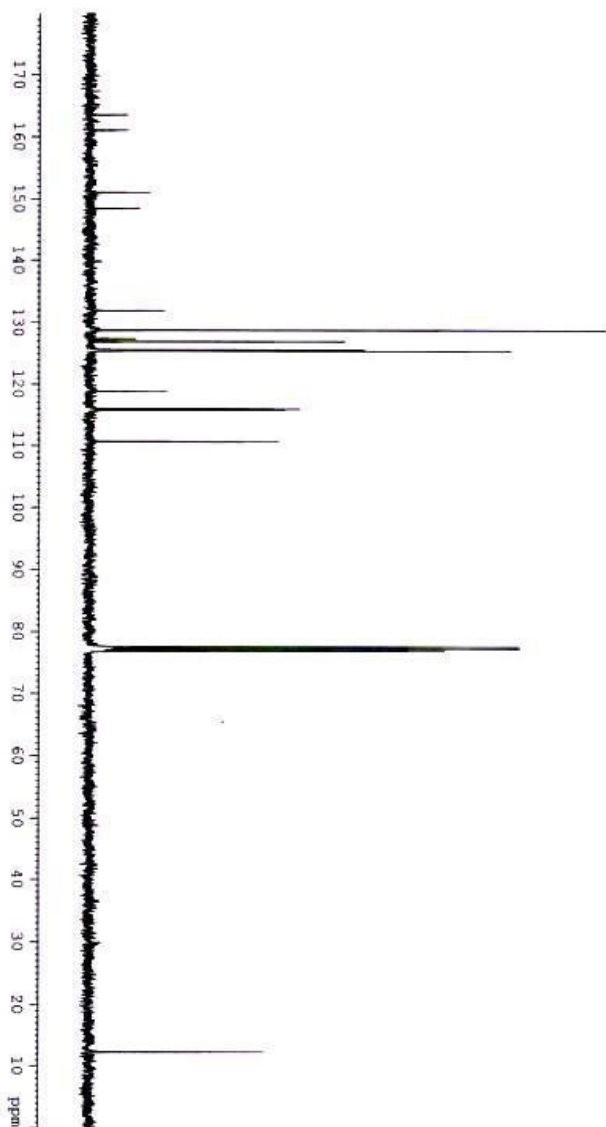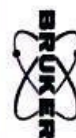

Current Data Parameters  
NAME: 3ae  
EXPNO: 1  
PROCNO: 1  
F2 - Acquisition Parameters  
Date\_: 20180525  
Time: 16.46  
INSTRUM: spect  
PROBHD: 5mm PABBO  
PULPROG: zgpg30  
TO: 3.2768  
SOLVENT: CDCl3  
NS: 512  
DS: 2  
SWH: 24039.461 Hz  
FIDRES: 0.0001259 Hz  
AQ: 0.681524 sec  
RG: 67.65  
DM: 20.800 usec  
DE: 6.50 usec  
TE: 298.0 K  
D1: 1.00000000 sec  
D11: 0.05000000 sec  
TPO: 1  
===== CHANNEL f1 =====  
NUC1: 13C  
P1: 6.90 usec  
PL1: 54.00000000 W  
SFO1: 100.6218398 MHz  
===== CHANNEL f2 =====  
CPDPRG2: waltz16  
NUC2: 1H  
P2: 50.00 usec  
PL2: 17.00000000 W  
PL12: 0.40792494 W  
PL13: 0.25410000 W  
SFO2: 400.1510006 MHz  
F2 - Processing parameters  
SI: 32768  
SF: 100.6171836 MHz  
WDW: EM  
SSB: 0  
GB: 0  
PC: 1.40

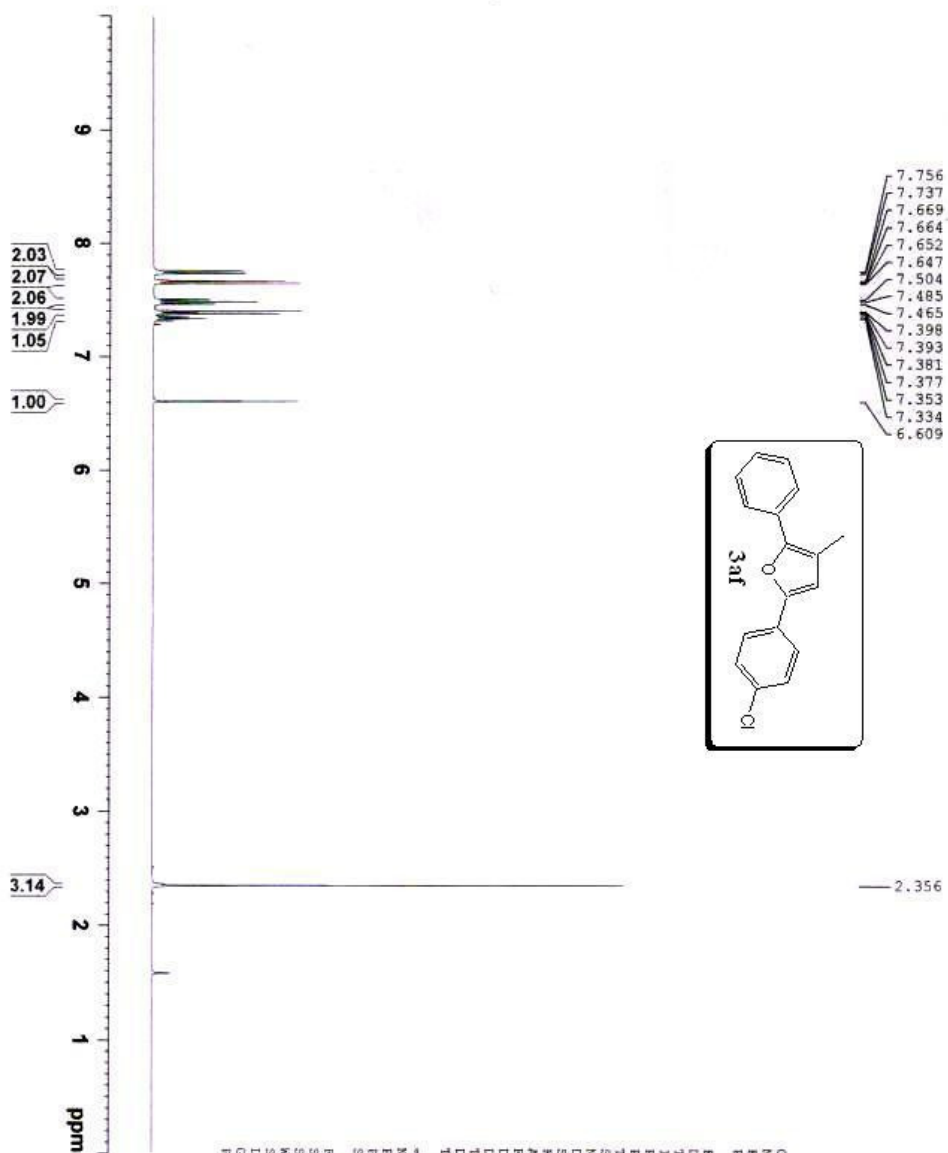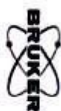

Current Data Parameters  
NAME Dr. A. HAJRA  
EXPNO 931  
PROCNO 1

F2 - Acquisition Parameters  
Date\_ 20130816  
Time 11.17  
INSTRUM spect  
PROBHD 5 mm PABBO BB/  
PULPROG zg30  
TD 32768  
FIDRES 0.32768  
SOLVENT CDCl3  
NS 24  
DS 2  
SWH 8223.682 Hz  
FIDRES 0.32768 Hz  
AQ 1.992344 sec  
RG 47.25  
RW 60.800 usec  
DE 6.50 usec  
TE 299.7 K  
D1 1.00000000 sec  
TDO 1

===== CHANNEL f1 =====  
NUC1 1H  
P1 18.75 usec  
PL1 11.99499989 W  
SFO1 400.1524711 MHz

F2 - Processing Parameters  
SI 16384  
SF 400.150000 MHz  
WDW EM  
SSB 0  
LB 0.30 Hz  
GB 0  
PC 1.00

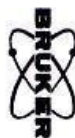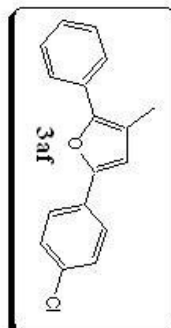

150.70  
148.64  
132.86  
131.68  
129.38  
128.97  
128.71  
126.96  
125.37  
124.94  
118.86  
111.37

77.48  
77.16  
76.84

12.18

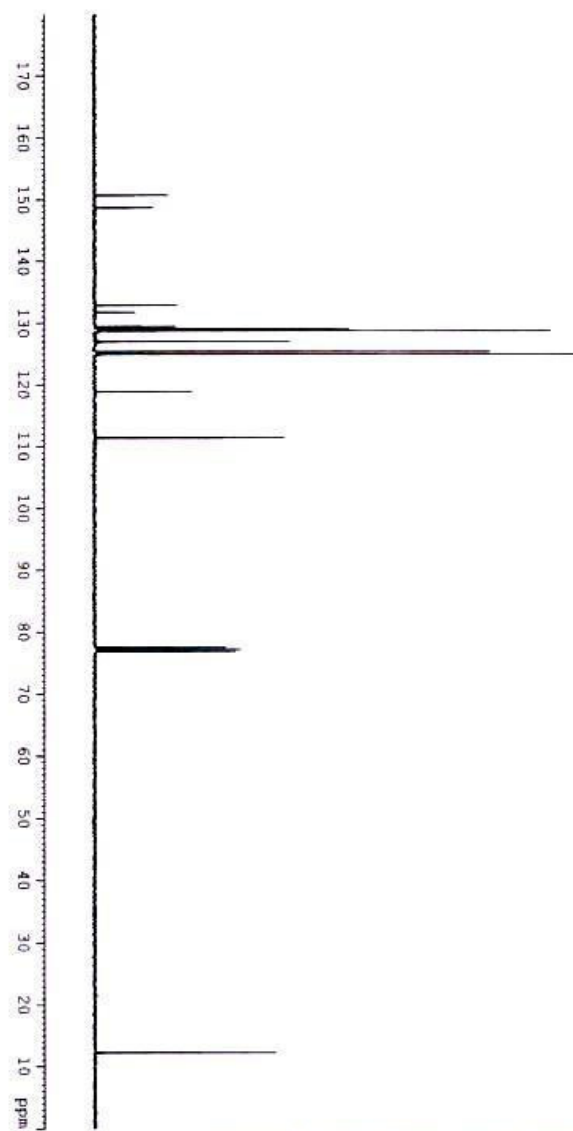

Current Data Parameters  
NAME Dr. A. SARMA  
EXPNO 312  
PROCNO 1  
F2 - Acquisition Parameters  
Date\_ 20100616  
Time 11:29  
INSTRUM spect  
PROBHD 5 mm VAMBO HB/  
PULPROG zgpg30  
TD 32768  
SOLVENT CDCl3  
NS 340  
DS 4  
SWH 24030.461 Hz  
FIDRES 0.73396 Hz  
AQ 0.6816244 sec  
RG 2048  
GB 0.0000000  
OR 2.0000000  
TE 300.4 K  
D1 2.00000000 sec  
D11 0.03000000 sec  
TPO 1

===== CHANNEL f1 =====  
NUC1 13C  
P1 8.40 usec  
PL1 24.0000000 W  
SFO1 100.6278588 MHz

===== CHANNEL f2 =====  
NAME vatic16  
EXPNO 312  
PROCNO 1  
PULPROG zgpg30  
PL1 12.0000000 W  
PL12 0.4079294 W  
PL13 0.2617001 W  
SFO2 400.1516006 MHz

F2 - Processing parameters  
SI 16384  
SF 100.617850 MHz  
WDW EM  
SSB 0  
GB 0  
LB 1.00 Hz  
GB 0  
PC 1.40

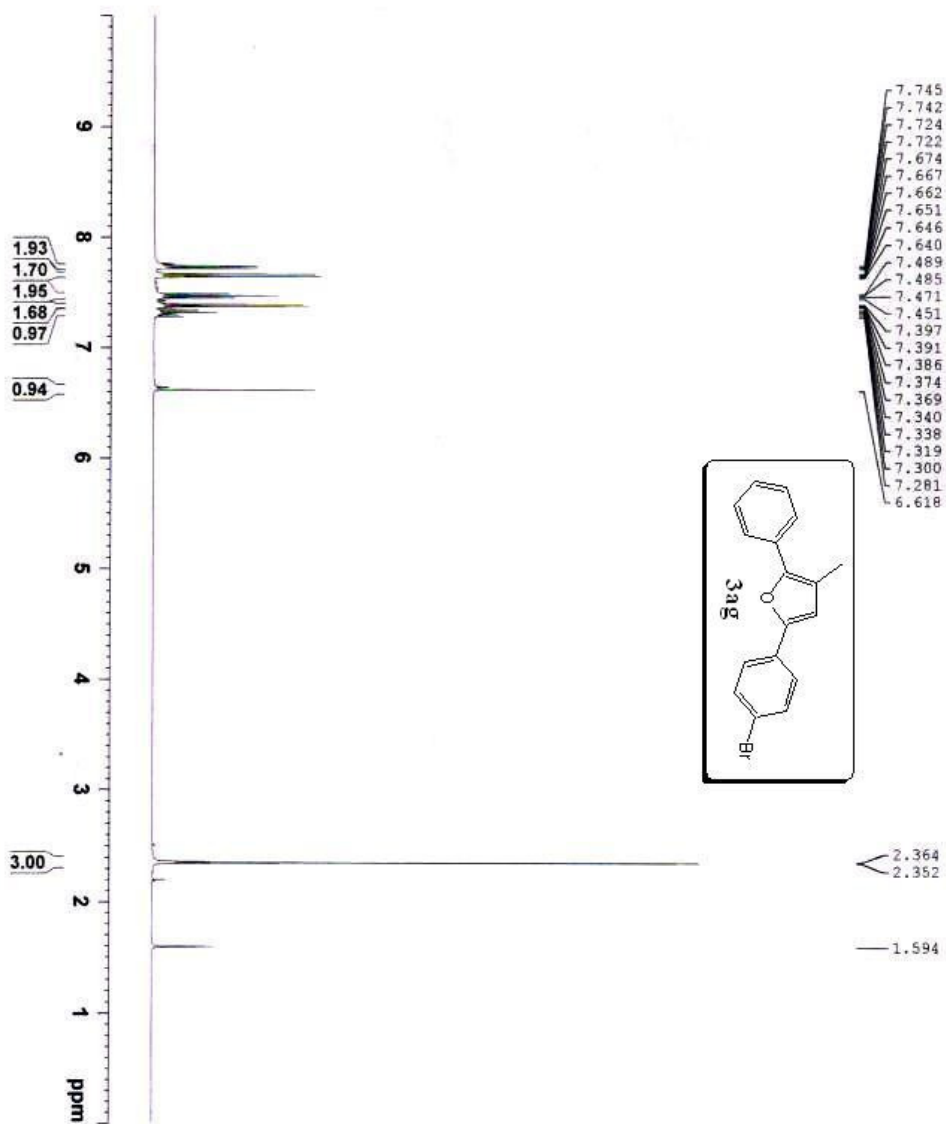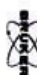

Current Data Parameters  
NAME Dr. A. Hajra  
EXNO 970  
PROCNO 1

F2 - Acquisition Parameters

Date 20130823  
Time 20:39  
INSTRUM spect  
PROBHD 5 mm PABBO-BB/  
PULPROG zgpg30  
TD 32768  
FIDRES 0.25967 Hz  
AQ 1.9923444 sec  
RG 67.01 usec  
RG 67.01 usec  
DE 1.50 usec  
TE 297.3 K  
D1 1.00000000 sec  
TDO 1

CHANNEL F1

NUC1 <sup>1</sup>H  
P1 14.75 usec  
PLW1 11.99499989 W  
SFO1 400.1524711 MHz

F2 - Processing Parameters

SI 16384  
SF 400.1500000 MHz  
WDW EM  
SSB 0  
LB 0  
GB 0  
PC 1.00

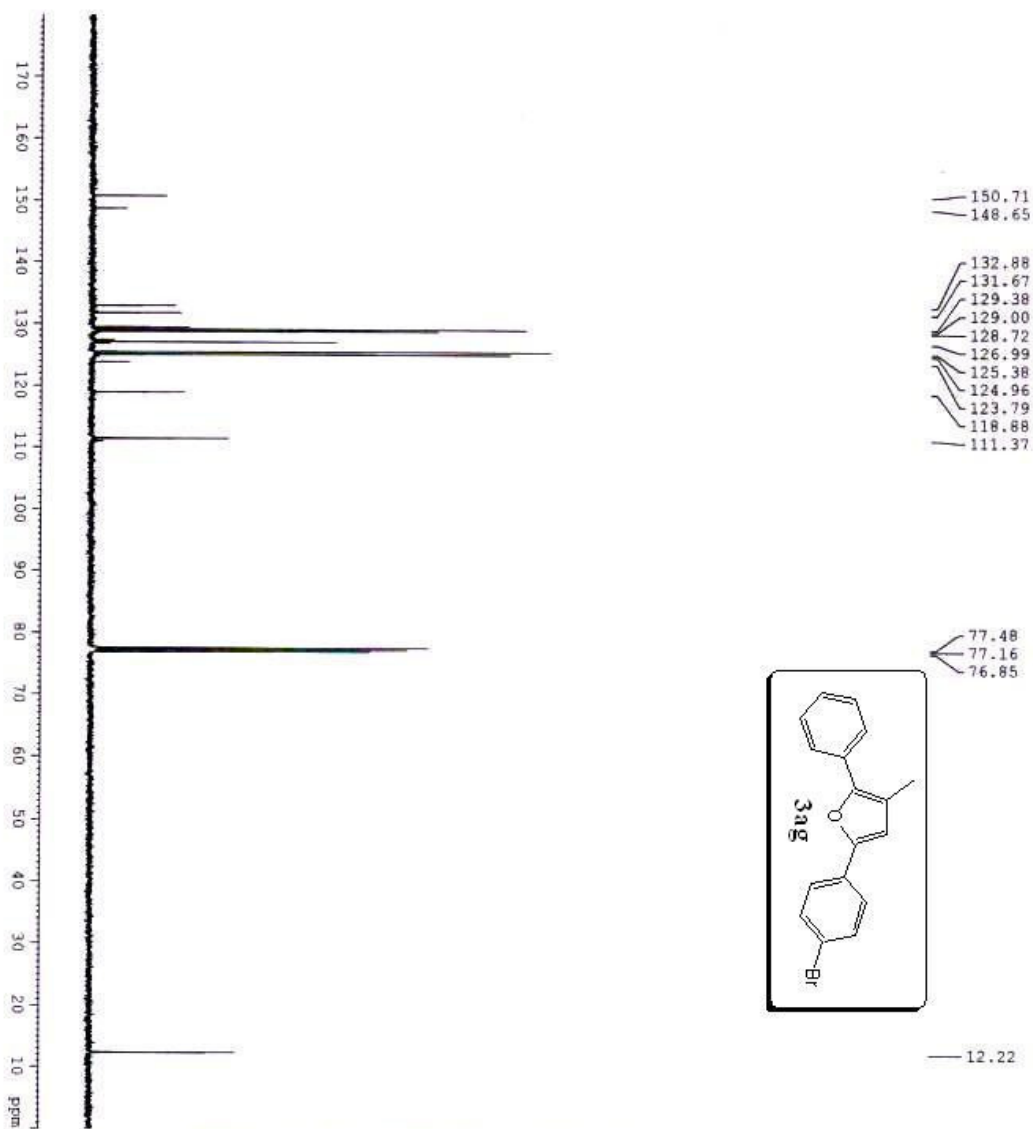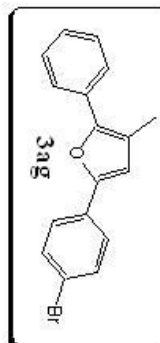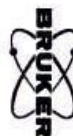

Current Data Parameters  
 NAME Dr. A. HANNA  
 EXPNO 943  
 PROCNO 1

F2 - Acquisition Parameters  
 Date\_ 2019.04.13  
 Time 9.43  
 INSTRON spect  
 PROBRD 5 mm PABBO BB/  
 FIDPROC 2992310  
 TO 3768  
 SOLVENT CDCl3  
 NS 320  
 DS 4  
 SWH 24038.461 Hz  
 FIDRES 0.733546 Hz  
 AQ 0.6816244 sec  
 RG 67.81  
 INE 20.800 usec  
 DE 28.30 usec  
 TE 300.2 K  
 D1 2.00000000 sec  
 D11 0.03000000 sec  
 TD9 1

===== CHANNEL f1 =====  
 NUC1 13C  
 P1 130 usec  
 PL1 0.00000000 M  
 SFO1 100.628588 MHz

===== CHANNEL f2 =====  
 NUC2 1H  
 P2 12.00 usec  
 PL2 0.00000000 M  
 SFO2 400.1516206 MHz

F2 - Processing parameters  
 SI 32768  
 SF 100.617785 MHz  
 KW 0  
 NSB 0  
 LB 1.00 Hz  
 GB 0  
 PC 1.40



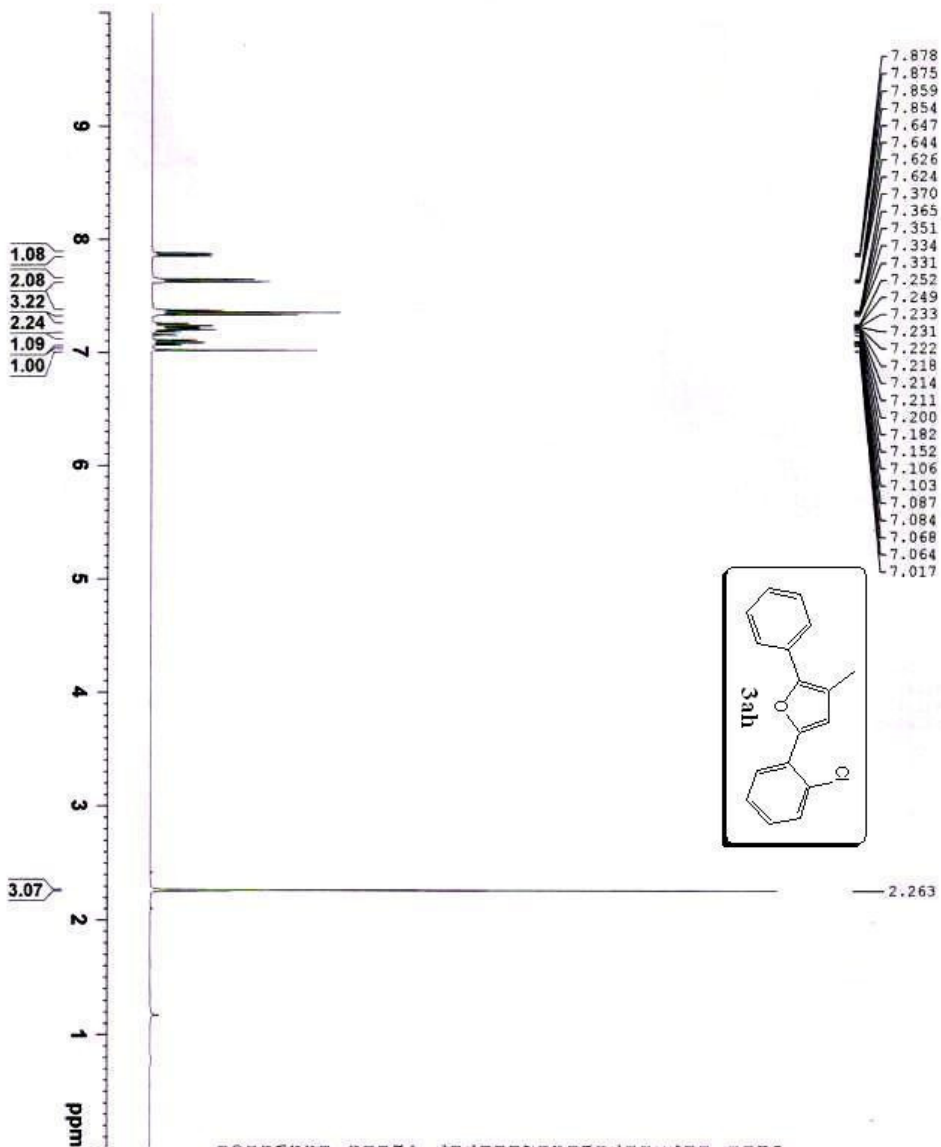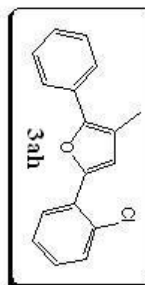

**Current Data Parameters**  
NAME: Dr. A. HAJRA  
EXPNO: 949  
PROCNO: 1

**F2 - Acquisition Parameters**  
Date\_: 20130819  
Time: 18.23  
INSTRUM: spect  
PROBHD: 5 mm PABBO BB/  
PULPROG: zg30  
TO: 32768  
SOLVENT: CDCl3  
NS: 24  
DS: 2  
SWH: 8223.683 Hz  
FIDRES: 0.250967 Hz  
AQ: 1.9923444 sec  
RG: 67.81  
DM: 60.800 usec  
DE: 6.50 usec  
TE: 295.1 K  
D1: 1.00000000 sec  
TDO: 1

**===== CHANNEL f1 =====**  
NUC1: <sup>1</sup>H  
P1: 14.75 usec  
PL1: 11.99499989 W  
SFO1: 400.1524711 MHz

**F2 - Processing parameters**  
SI: 16384  
SF: 400.1500518 MHz  
WDW: EM  
SSB: 0  
LB: 0.30 Hz  
GB: 0  
PC: 1.00

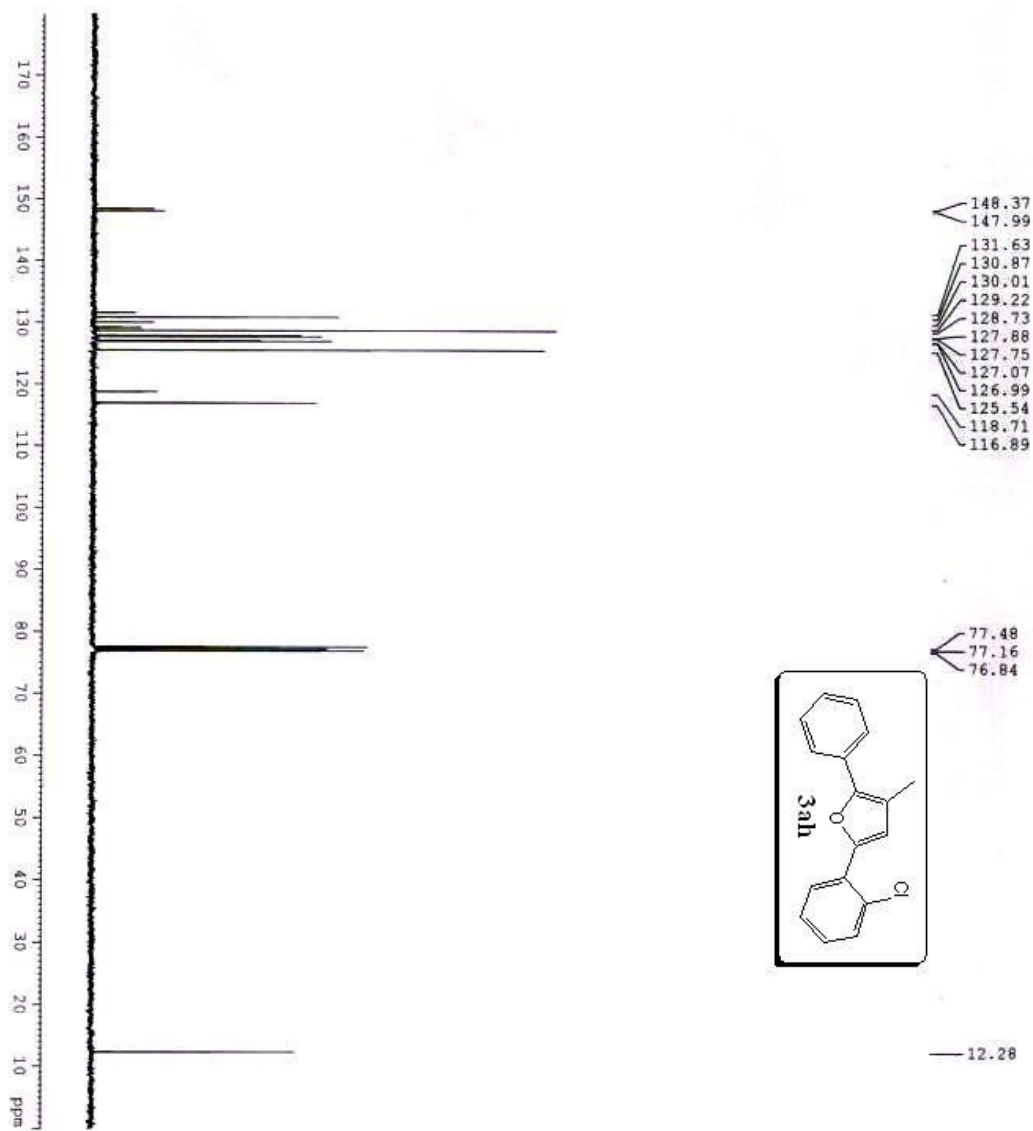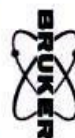

Current Data Parameters  
NAME Dr. A. BALVA  
EXPNO 950  
PROCNO 1

F2 - Acquisition Parameters  
Date\_ 20100913  
Time 18:37  
INSTRUM spect  
PROBHD 5 mm PABBO BB/  
PULPROG zgpg30  
TD 32768  
SOLVENT CDCl3  
NS 240  
DS 4  
SWH 24018.441 Hz  
FIDRES 0.723596 Hz  
AQ 0.6116244 sec  
RG 67.87  
DM 20.800 usec  
DE 6.50 usec  
TE 300.0 K  
D11 2.01000000 sec  
D11 0.03000000 sec  
TD0 1

===== CHANNEL f1 =====  
NUC1 13C  
P1 132  
PL1 8.90 usec  
PL11 54.00000000 dB  
SFO1 100.6275588 MHz

===== CHANNEL f2 =====  
CPCPRG2 waltz16  
NUC2 1H  
P2 16  
PL2 80.00 usec  
PL12 13.00000000 dB  
PL13 0.10732999 W  
PL14 0.36107001 W  
SFO2 400.1516006 MHz

F2 - Processing parameters  
SI 16384  
SF 100.6177872 MHz  
WDW DN  
SSB 0  
LB 1.00 Hz  
GB 0  
PC 1.40

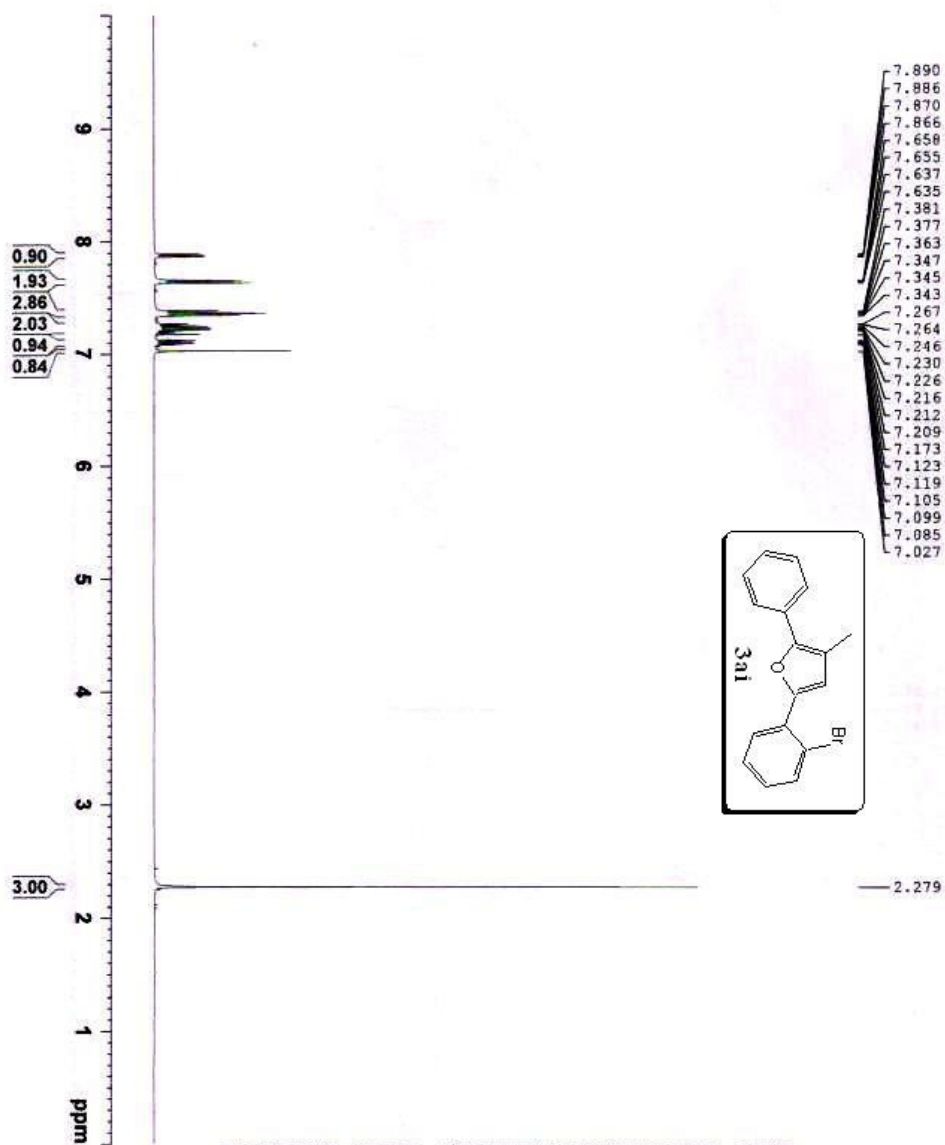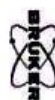

Current Data Parameters  
NAME Dr. A HAIRA  
EXPNO 978  
PROCNO 1

F2 - Acquisition Parameters  
Date\_ 20100824  
Time 17:49  
INSTRUM spect  
PROBHD 5 mm PABBO BB/  
PULPROG zg30  
TD 32768  
SOLVENT CDCl3  
NS 32  
DS 2  
SWH 8223.685 Hz  
FIDRES 0.253267 Hz  
AQ 1.592344 sec  
RG 91.46  
BW 60.800 usec  
DE 6.50 usec  
TE 297.1 K  
D1 1.00000000 sec  
TD0 1

===== CHANNEL f1 =====  
NUC1 13C  
P1 14.70 usec  
PL1 0.00 dB  
SFO1 400.1524711 MHz

F2 - Processing parameters  
SI 16384  
SF 400.1500433 MHz  
WDW EM  
SSB 0  
LB 0.30 Hz  
GB 0  
PC 1.00

148.39  
148.01  
131.64  
130.88  
130.03  
129.25  
128.73  
127.89  
127.77  
127.08  
127.00  
125.55  
118.70  
116.88

77.47  
77.15  
76.84

12.27

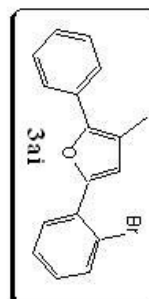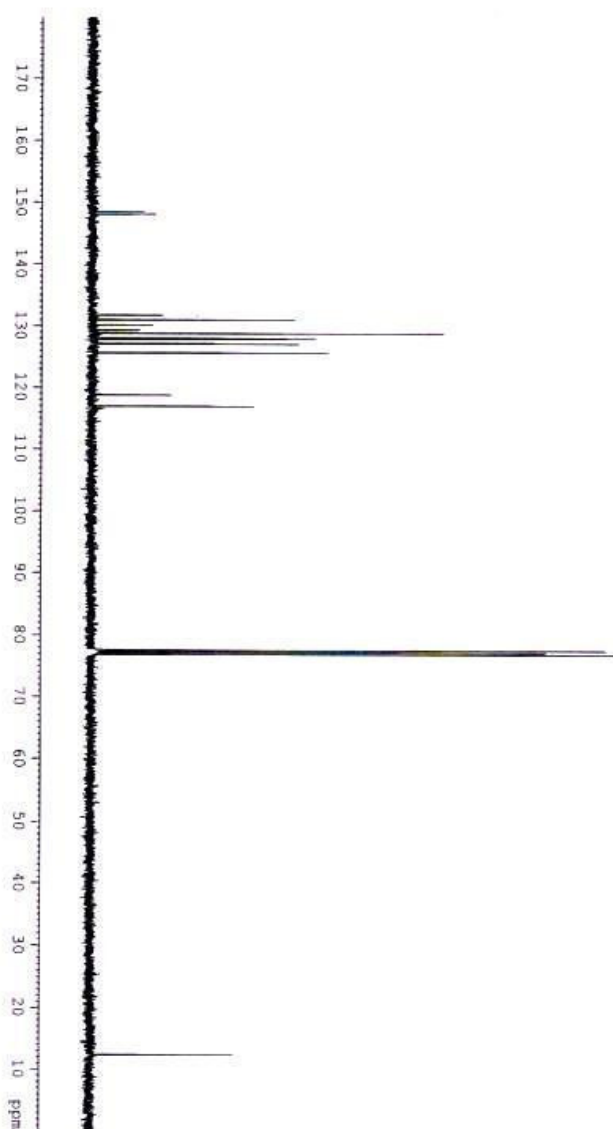

Current Data Parameters  
NAME: Dr. A. HAUSA  
EXNO: 913  
PROCNO: 1  
F2 - Acquisition Parameters  
Date: 2013024  
Time: 18.05  
INSTRUM: spect  
PROBHD: 5 mm PABBO BB/  
PULPROG: zgpg30  
TD: 65536  
AQ: 0.1446  
RG: 320  
SOLVENT: CDCl3  
NS: 120  
DS: 2  
SWH: 24038.461 Hz  
FIDRES: 0.133596 Hz  
AQ: 0.6816244 sec  
RG: 320  
SOLVENT: CDCl3  
TE: 300.2 K  
DE: 6.30 usec  
TE: 298.0 K  
D1: 2.00000000 sec  
D11: 0.03000000 sec  
D08: 1  
===== CHANNEL f1 =====  
NUC1: 13C  
P1: 4.90 usec  
PLM1: 54.0000000 W  
SFO1: 100.6278588 MHz  
===== CHANNEL f2 =====  
CPDPRG2: waltz16  
NUC2: 1H  
P2: 80.00 usec  
PLM2: 12.00000000 W  
SFO2: 400.146091 MHz  
===== F2 - Processing parameters =====  
SI: 16384  
SF: 100.617851 MHz  
WDW: EM  
GB: 0  
LB: 1.00 Hz  
GB: 0  
PC: 1.40

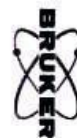

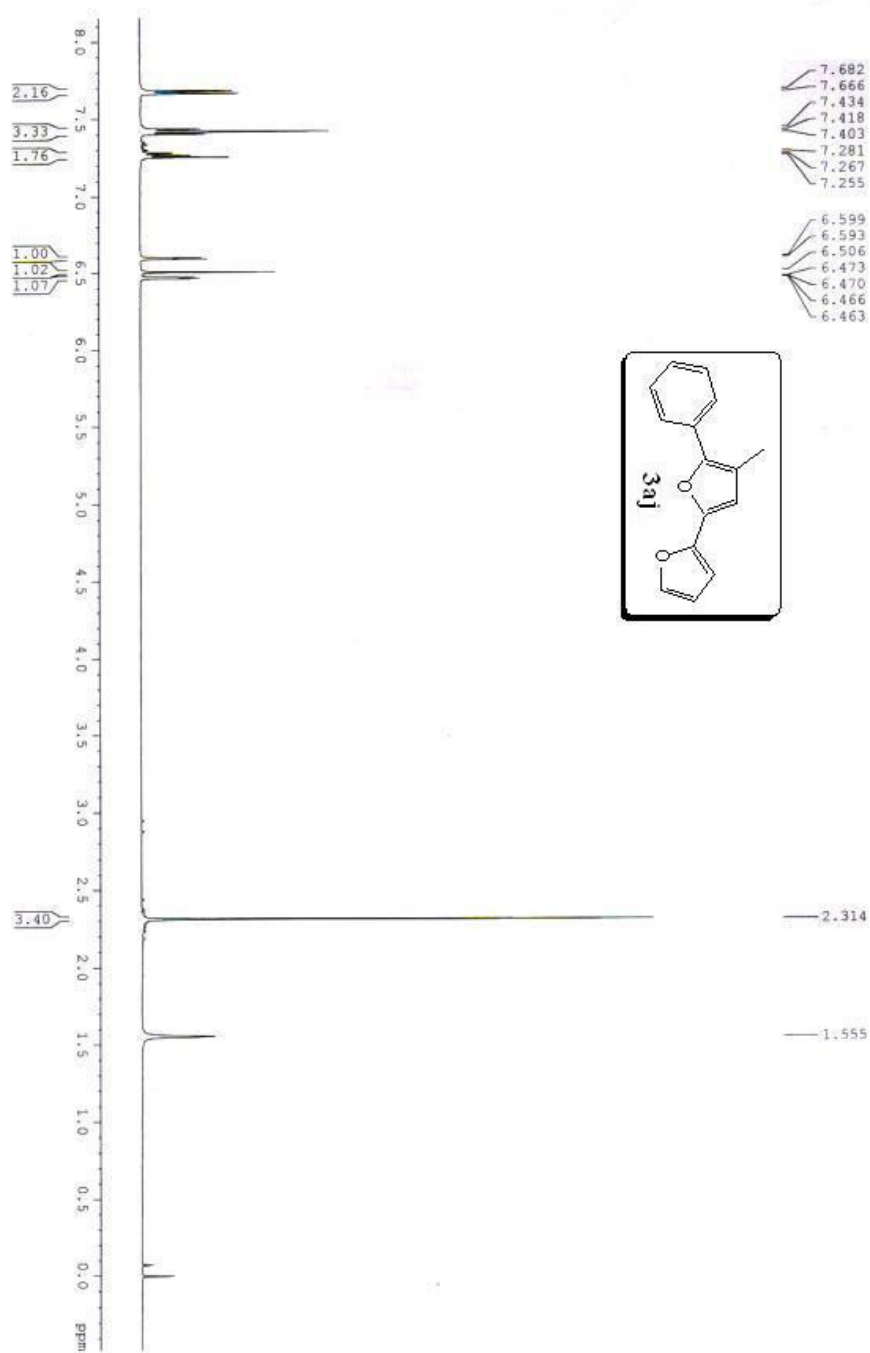

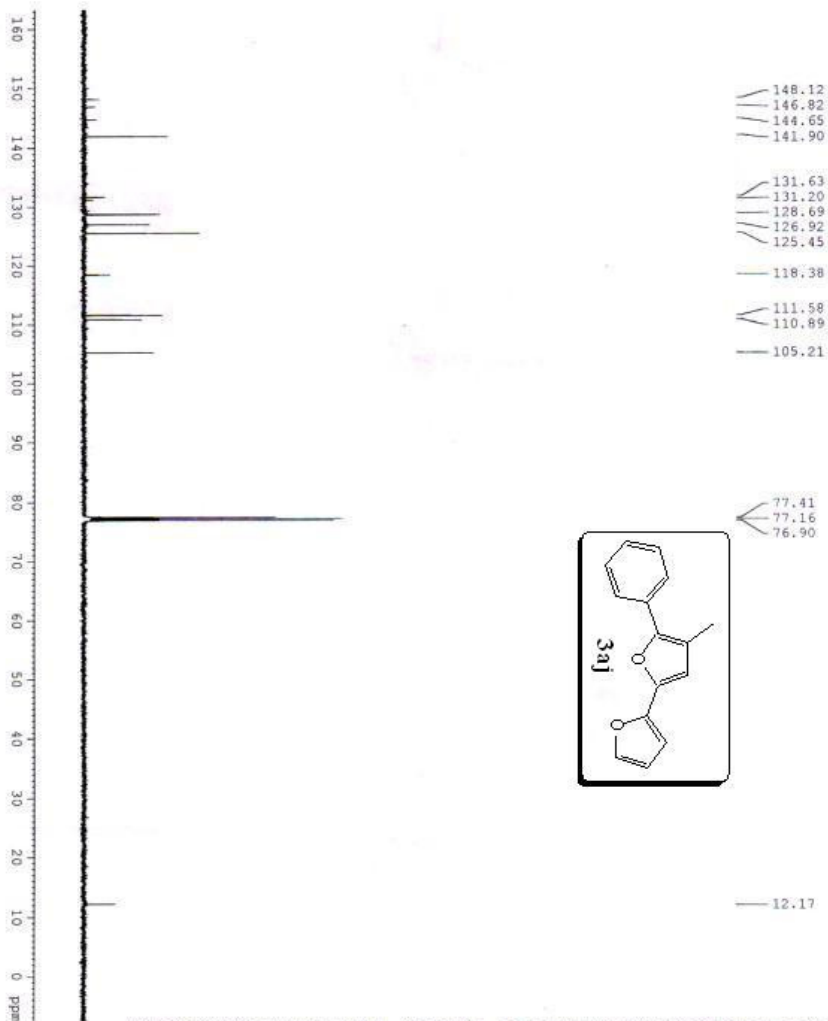

|         |                |
|---------|----------------|
| NAME    | ACK04-13C      |
| EXPNO   | 1              |
| PROCNO  | 1              |
| DATE_   | 20131021       |
| TIME    | 11:11          |
| INSTRUM | 5 mm PABBO BB- |
| PROBHD  | zgpg30         |
| PULPROG | zgpg30         |
| TD      | 32768          |
| SOLVENT | CDCl3          |
| NS      | 945            |
| DS      | 4              |
| SWH     | 29761.904 Hz   |
| FIDRES  | 0.908261 Hz    |
| AQ      | 0.550524 sec   |
| RG      | 32             |
| DE      | 16.800 usec    |
| TE      | 299.3 K        |
| D1      | 2.00000000 sec |
| D11     | 0.03000000 sec |
| TD0     | 1              |

  

|            |                 |
|------------|-----------------|
| CHANNEL F1 |                 |
| NUC1       | 13C             |
| P1         | 9.88 usec       |
| PL1        | 0.10 dB         |
| PL1W       | 82.1610610 W    |
| SFO1       | 125.7703643 MHz |

  

|            |                 |
|------------|-----------------|
| CHANNEL F2 |                 |
| CPDPRG2    | waltz16         |
| NUC2       | 1H              |
| PCPD2      | 80.00 usec      |
| PL2        | 1.00 dB         |
| PL12       | 16.50 dB        |
| PL13       | 20.00 dB        |
| PL1W       | 15.50230623 W   |
| PL13W      | 0.44440623 W    |
| PL13M      | 0.19517358 W    |
| SFO2       | 500.1320005 MHz |
| SI         | 16384           |
| SF         | 125.7377659 MHz |
| WDW        | EM              |
| SSB        | 0               |
| LB         | 1.00 Hz         |
| GB         | 0               |
| PC         | 1.40            |

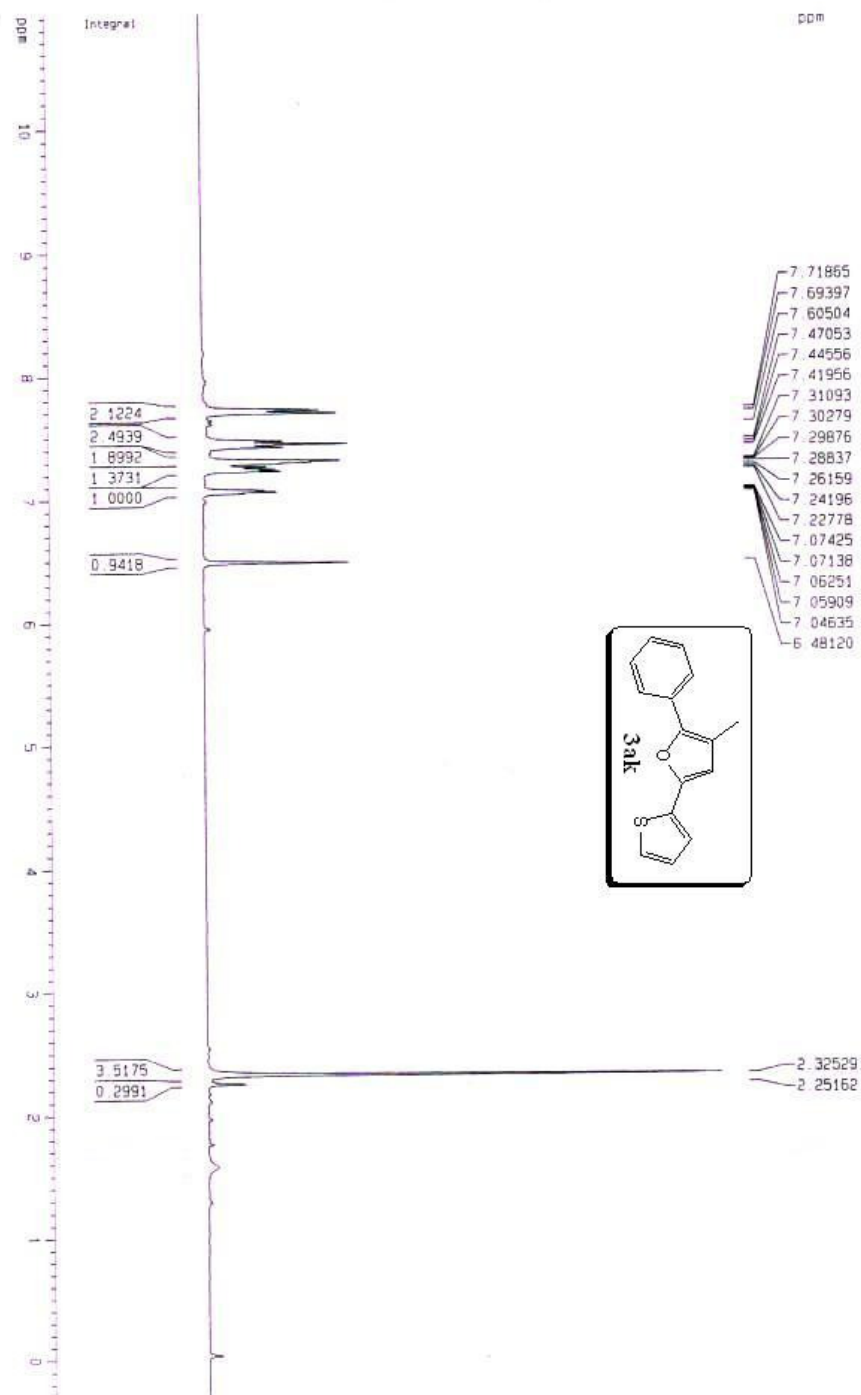

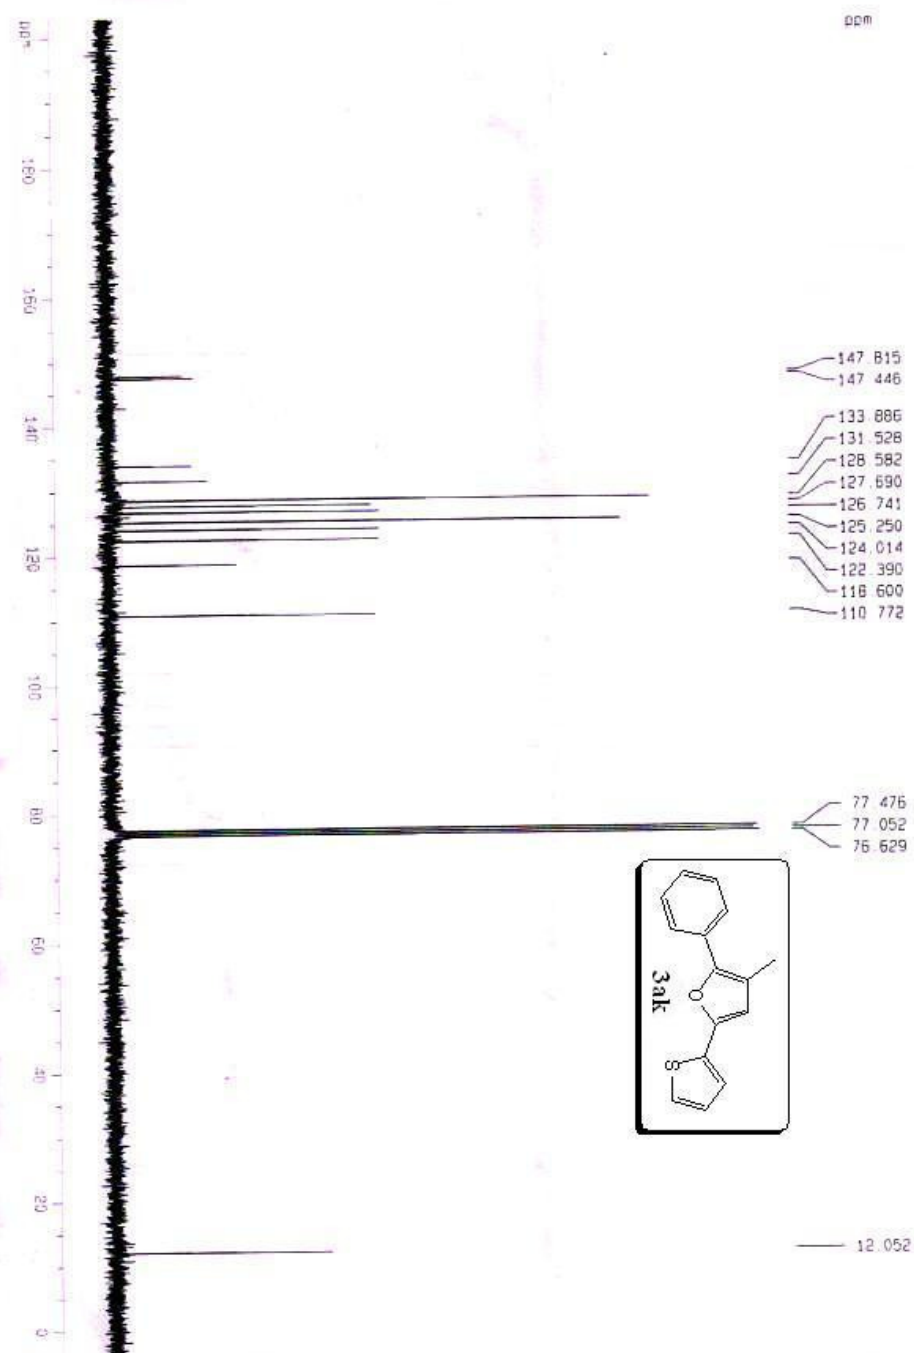

Current Data Parameters  
 Name: 20131108  
 Date: 20131108  
 Time: 16:00  
 Instrument: 5 mm BBO BB-1H  
 Acquisition: 200 MHz  
 P1: 12.00  
 FIDRES: 0.000000  
 AQ: 0.000000  
 SFO: 200.130000  
 F2 - Acquisition Parameters  
 Name: 20131108  
 Date: 20131108  
 Time: 16:00  
 Instrument: 5 mm BBO BB-1H  
 Acquisition: 200 MHz  
 P1: 12.00  
 FIDRES: 0.000000  
 AQ: 0.000000  
 SFO: 200.130000  
 F2 - Processing parameters  
 SI: 32768  
 SF: 200.130000  
 F2: 200.130000  
 EQ: 0  
 GB: 0  
 LB: 1.00 Hz  
 GB: 0  
 PC: 1.00  
 TO: 20.00 cm  
 F1: 200.130000  
 F2: 200.130000  
 F3: 200.130000  
 F4: 200.130000  
 F5: 200.130000  
 F6: 200.130000  
 F7: 200.130000  
 F8: 200.130000  
 F9: 200.130000  
 F10: 200.130000  
 F11: 200.130000  
 F12: 200.130000  
 F13: 200.130000  
 F14: 200.130000  
 F15: 200.130000  
 F16: 200.130000  
 F17: 200.130000  
 F18: 200.130000  
 F19: 200.130000  
 F20: 200.130000  
 F21: 200.130000  
 F22: 200.130000  
 F23: 200.130000  
 F24: 200.130000  
 F25: 200.130000  
 F26: 200.130000  
 F27: 200.130000  
 F28: 200.130000  
 F29: 200.130000  
 F30: 200.130000  
 F31: 200.130000  
 F32: 200.130000  
 F33: 200.130000  
 F34: 200.130000  
 F35: 200.130000  
 F36: 200.130000  
 F37: 200.130000  
 F38: 200.130000  
 F39: 200.130000  
 F40: 200.130000  
 F41: 200.130000  
 F42: 200.130000  
 F43: 200.130000  
 F44: 200.130000  
 F45: 200.130000  
 F46: 200.130000  
 F47: 200.130000  
 F48: 200.130000  
 F49: 200.130000  
 F50: 200.130000  
 F51: 200.130000  
 F52: 200.130000  
 F53: 200.130000  
 F54: 200.130000  
 F55: 200.130000  
 F56: 200.130000  
 F57: 200.130000  
 F58: 200.130000  
 F59: 200.130000  
 F60: 200.130000  
 F61: 200.130000  
 F62: 200.130000  
 F63: 200.130000  
 F64: 200.130000  
 F65: 200.130000  
 F66: 200.130000  
 F67: 200.130000  
 F68: 200.130000  
 F69: 200.130000  
 F70: 200.130000  
 F71: 200.130000  
 F72: 200.130000  
 F73: 200.130000  
 F74: 200.130000  
 F75: 200.130000  
 F76: 200.130000  
 F77: 200.130000  
 F78: 200.130000  
 F79: 200.130000  
 F80: 200.130000  
 F81: 200.130000  
 F82: 200.130000  
 F83: 200.130000  
 F84: 200.130000  
 F85: 200.130000  
 F86: 200.130000  
 F87: 200.130000  
 F88: 200.130000  
 F89: 200.130000  
 F90: 200.130000  
 F91: 200.130000  
 F92: 200.130000  
 F93: 200.130000  
 F94: 200.130000  
 F95: 200.130000  
 F96: 200.130000  
 F97: 200.130000  
 F98: 200.130000  
 F99: 200.130000  
 F100: 200.130000



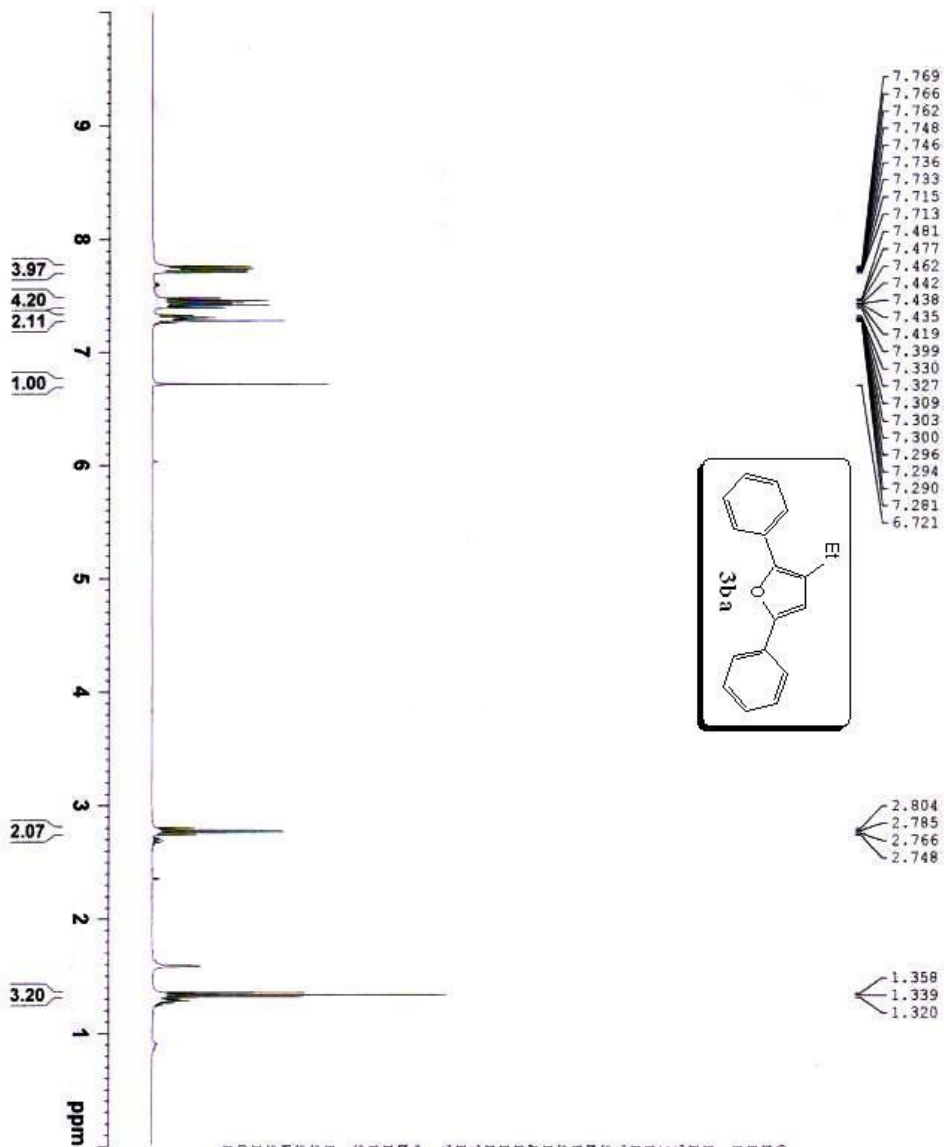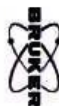

Current Data Parameters  
NAME Dr. A. HAJRA  
EXPNO 202  
PROCNO 1

F2 - Acquisition Parameters  
Date\_ 20130924  
Time 19.50  
INSTRUM spect  
PROBHD 5 mm PABBO BB/  
PULPROG zg30  
TD 32768  
SOLVENT CDCl3  
NS 32  
DS 2  
SWH 8223.685 Hz  
FIDRES 0.220067 Hz  
AQ 1.9623444 sec  
RG 93.46  
INW 60.800 usec  
DE 6.50 usec  
TE 297.1 K  
D1 1.00000000 sec  
TD0 1

===== CHANNEL f1 =====  
NUC1 1H  
P1 14.70 usec  
PL1 0.00000000 W  
SFO1 400.1524711 MHz

F2 - Processing parameters  
SI 16384  
SF 400.1500000 MHz  
WDW EM  
SSB 0  
LB 0.30 Hz  
GB 0  
PC 1.00

151.94  
147.58  
131.71  
130.80  
128.62  
128.52  
128.40  
127.13  
126.75  
125.44  
125.37  
125.16  
123.62  
108.61

77.29  
77.18  
76.97  
76.66

19.29  
14.39

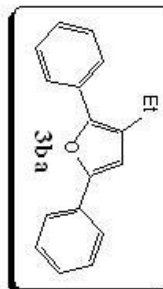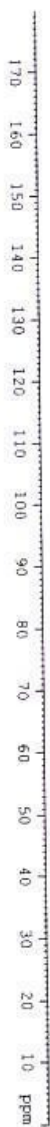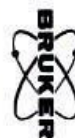

Current Data Parameters  
NAME: 17\_A\_WATRA\_1  
EXPNO: 203  
PROCNO: 1

F2 - Acquisition Parameters  
Date\_: 20110924  
Time: 12.10

INSTRUM: spect  
PROBHD: 5 mm PABBO BH/

PULPROG: zgpg30  
TO: 32768

SOLVENT: CDCl3  
NS: 400

DS: 4  
SWH: 34038.461 Hz

FIDRES: 0.733596 Hz  
AQ: 0.6816244 sec

RG: 67.66  
DE: 20.800 usec

TE: 300.2 K  
DE: 2.00000000 sec

D11: 0.03000000 sec  
TD0: 1

===== CHANNEL f1 =====  
NUC1: 13C  
P1: 130 usec  
PL1: 0.00000000 W  
SFO1: 100.628358 MHz

===== CHANNEL f2 =====  
NUC2: 1H  
P2: 12.00 usec  
PL2: 0.00000000 W  
SFO2: 400.1514206 MHz

===== CHANNEL f3 =====  
NUC3: 1H  
P3: 12.00 usec  
PL3: 0.00000000 W  
SFO3: 400.1514206 MHz

===== CHANNEL f4 =====  
NUC4: 1H  
P4: 12.00 usec  
PL4: 0.00000000 W  
SFO4: 400.1514206 MHz

===== CHANNEL f5 =====  
NUC5: 1H  
P5: 12.00 usec  
PL5: 0.00000000 W  
SFO5: 400.1514206 MHz

===== CHANNEL f6 =====  
NUC6: 1H  
P6: 12.00 usec  
PL6: 0.00000000 W  
SFO6: 400.1514206 MHz

===== CHANNEL f7 =====  
NUC7: 1H  
P7: 12.00 usec  
PL7: 0.00000000 W  
SFO7: 400.1514206 MHz

===== CHANNEL f8 =====  
NUC8: 1H  
P8: 12.00 usec  
PL8: 0.00000000 W  
SFO8: 400.1514206 MHz

===== CHANNEL f9 =====  
NUC9: 1H  
P9: 12.00 usec  
PL9: 0.00000000 W  
SFO9: 400.1514206 MHz

===== CHANNEL f10 =====  
NUC10: 1H  
P10: 12.00 usec  
PL10: 0.00000000 W  
SFO10: 400.1514206 MHz

===== CHANNEL f11 =====  
NUC11: 1H  
P11: 12.00 usec  
PL11: 0.00000000 W  
SFO11: 400.1514206 MHz

===== CHANNEL f12 =====  
NUC12: 1H  
P12: 12.00 usec  
PL12: 0.00000000 W  
SFO12: 400.1514206 MHz

===== CHANNEL f13 =====  
NUC13: 1H  
P13: 12.00 usec  
PL13: 0.00000000 W  
SFO13: 400.1514206 MHz

===== CHANNEL f14 =====  
NUC14: 1H  
P14: 12.00 usec  
PL14: 0.00000000 W  
SFO14: 400.1514206 MHz

===== CHANNEL f15 =====  
NUC15: 1H  
P15: 12.00 usec  
PL15: 0.00000000 W  
SFO15: 400.1514206 MHz

===== CHANNEL f16 =====  
NUC16: 1H  
P16: 12.00 usec  
PL16: 0.00000000 W  
SFO16: 400.1514206 MHz

===== CHANNEL f17 =====  
NUC17: 1H  
P17: 12.00 usec  
PL17: 0.00000000 W  
SFO17: 400.1514206 MHz

===== CHANNEL f18 =====  
NUC18: 1H  
P18: 12.00 usec  
PL18: 0.00000000 W  
SFO18: 400.1514206 MHz

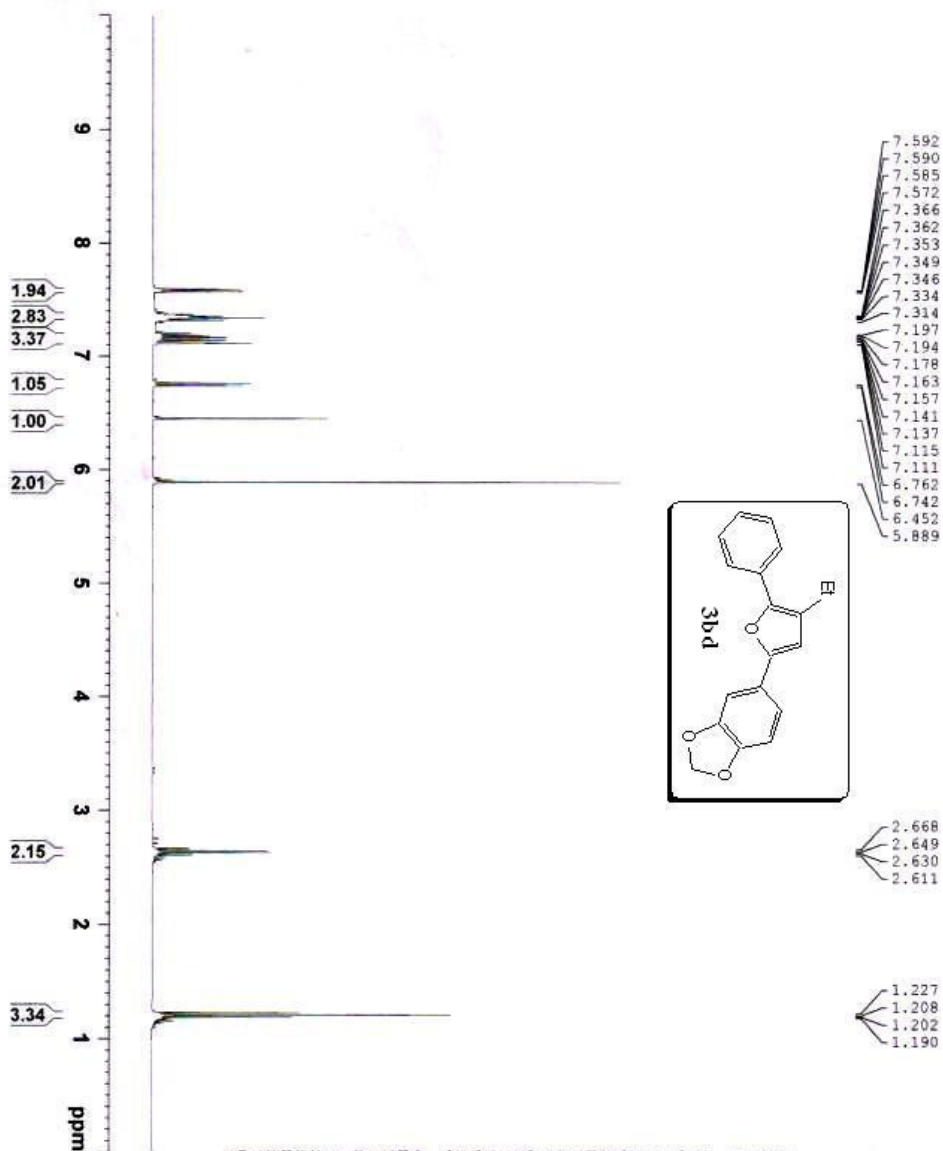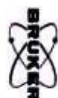

Current Data Parameters  
NAME 3bd  
EXPNO 214  
PROCNO 1

F2 - Acquisition Parameters  
Date\_ 20100929  
Time 17.11  
INSTRUM spect  
PROBHD 5 mm PARBO BB/  
PULPROG zg30  
TD 32768  
SOLVENT CDCl3  
DS 24  
SS 2  
SWH 8223.685 Hz  
FIDRES 0.250967 Hz  
AQ 1.8923444 sec  
RG 62.69  
DM 60.800 usec  
DE 6.50 usec  
TE 297.0 K  
D1 1.00000000 sec  
TD0 1

===== CHANNEL f1 =====  
NUC1 <sup>1</sup>H  
P1 14.75 usec  
PLW1 11.99439989 W  
SFO1 400.1524711 MHz

F2 - Processing parameters  
SI 16384  
SF 400.1500472 MHz  
WDW EM  
SSB 0  
GB 0  
PC 1.00

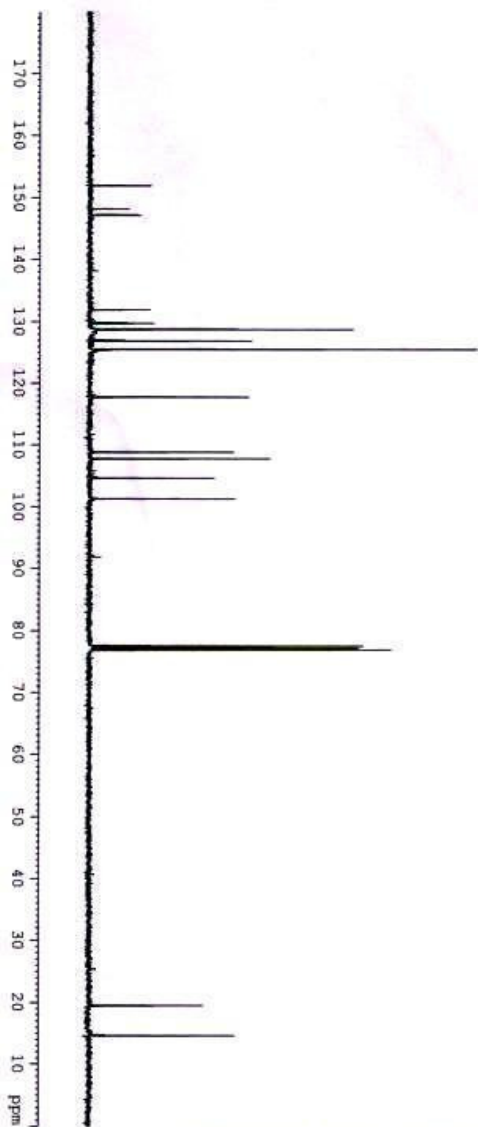

151.94  
148.11  
147.18  
147.04

131.86  
129.61  
128.67  
128.28  
126.77  
125.47  
117.68

108.74  
107.71  
104.57  
101.23

77.47  
77.16  
76.84

19.44  
14.53

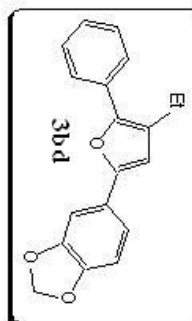

Current Data Parameters  
NAME Dr. A. NADIA 1  
EXPNO 246  
PROCNO 1  
F2 - Acquisition Parameters  
Date\_ 201105  
Time\_ 13.04  
INSTRUM spect  
PROBHD 5 mm PABBO BB/  
PULPROG zgpg30  
TD 32768  
SOLVENT CDCl3  
DS 402  
SWH 24038.461 Hz  
FIDRES 0.733596 Hz  
AQ 0.6516244 sec  
RG 62.69  
RW 20.800 usec  
DS 402  
TE 296.4 K  
D11 2.00000000 sec  
TDO 0.03000000 sec  
1  
===== CHANNEL f1 =====  
NUC1 13C  
P1 8.50 usec  
PL1 34.00000000 M  
SFO1 100.6275568 MHz  
===== CHANNEL f2 =====  
CPDPRG2 waltz16  
NUC2 1H  
PCPD2 80.00 usec  
PLM2 12.00000000 M  
PLM12 0.40732949 M  
PLM13 0.26107001 M  
SFO2 400.1516006 MHz  
F2 - Processing parameters  
SI 32768  
SF 100.6177600 MHz  
WDW EM  
SSB 0  
LB 1.00 Hz  
GB 0  
PC 1.40

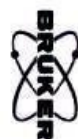

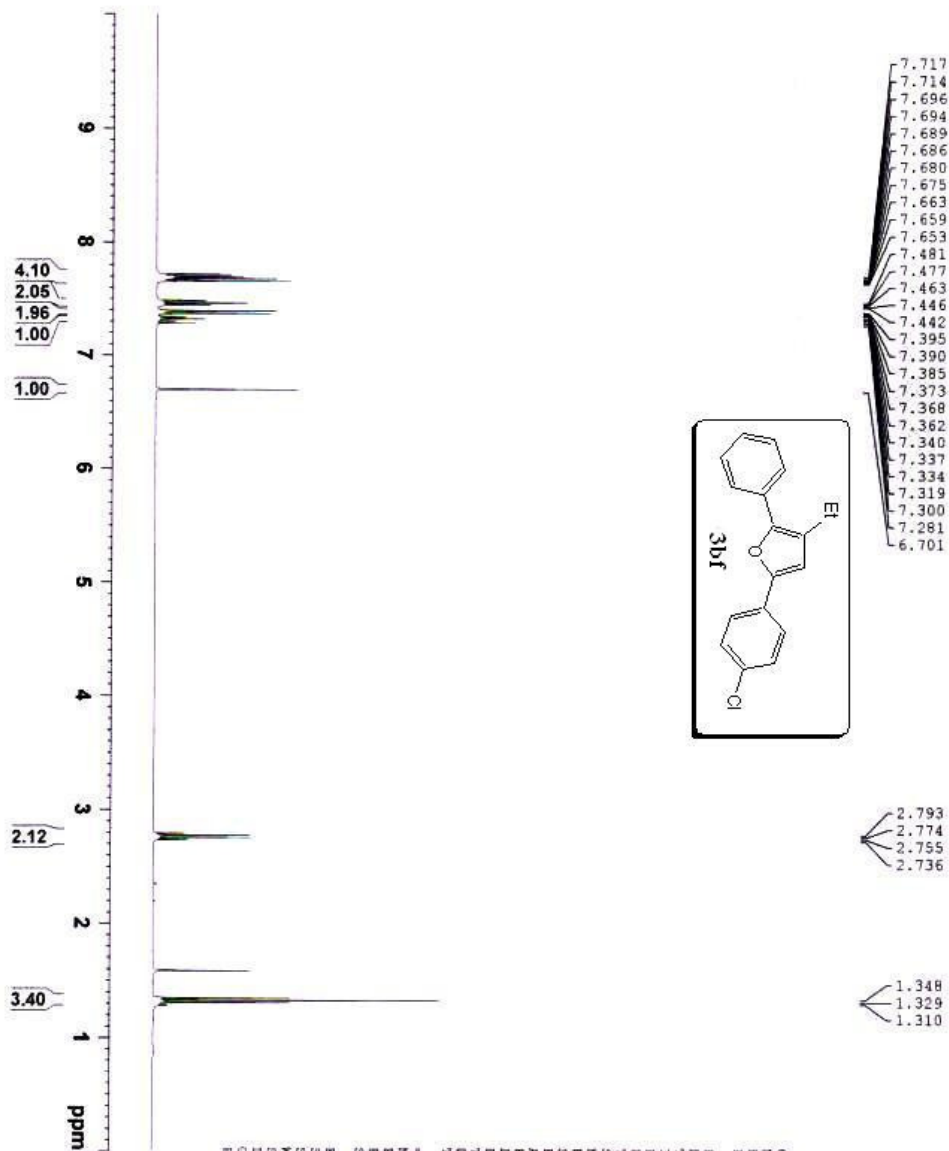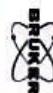

Current Data Parameters  
NAME Dr. A HAJRA.1  
EXPNO 189  
PROCNO 1

F2 - Acquisition Parameters

Date\_ 20130922  
Time 19.08  
INSTRUM spect  
PROBHD 5 mm PABBO-1H  
PULPROG zgpg30  
TD 32768  
SOLVENT CDCl<sub>3</sub>  
NS 24  
DS 2  
SWH 8223.685 Hz  
FIDRES 0.250967 Hz  
AQ 1.9923444 sec  
RG 81.66 usec  
IN 65.50 usec  
DE 296.7 K  
TE 1.0000000 sec  
D1 1

CHANNEL f1

NUC1 <sup>1</sup>H  
P1 14.75 usec  
PLM1 11.99499989 W  
SFO1 400.1524711 MHz  
F2 - Processing parameters  
SI 16384  
SF 400.1500000 MHz  
WDW EM  
SSB 0  
LB 0.30 Hz  
GB 0  
PC 1.00

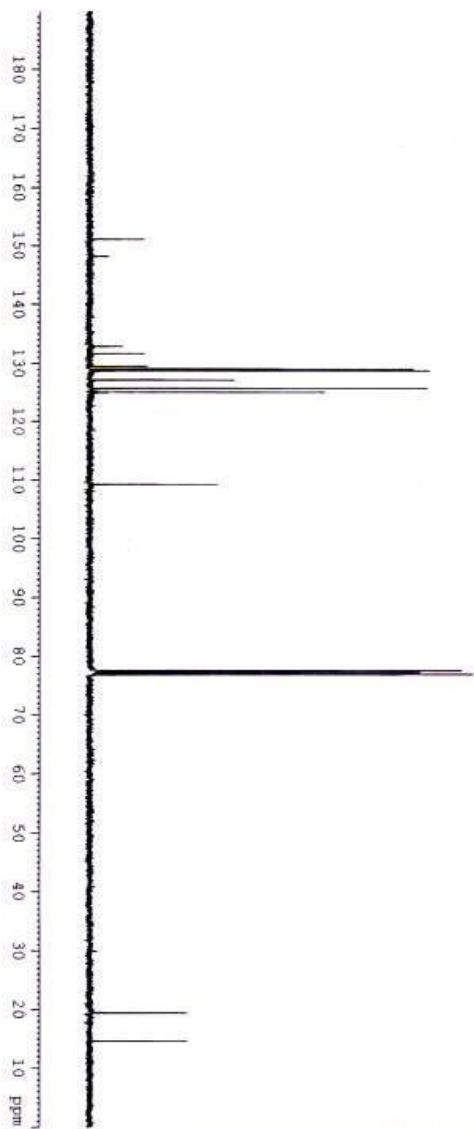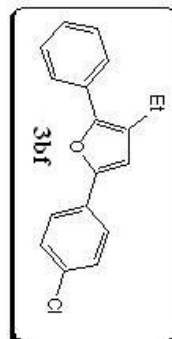

151.05  
148.11  
132.87  
131.65  
129.47  
129.00  
128.74  
127.12  
125.67  
125.62  
124.98  
109.23

77.47  
77.15  
76.84

19.41  
14.54

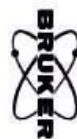

Current Data Parameters  
NAME: Dr. A. BALHA 1  
EXPNO: 190  
PROCNO: 1  
F2 - Acquisition Parameters  
Date\_ Time: 20100922 19.27  
INSTRUM: spect  
PROBHD: 5 mm PABBO BB7  
PULPROG: zgpg30  
F2 - Processing parameters  
SI: 32768  
SF: 100.6177850 MHz  
WDW: EM  
SSB: 0  
LB: 1.00 Hz  
GB: 0  
PC: 1.40

----- CHANNEL f1 -----  
NUC1: 13C  
P1: 8.50 usec  
PLW1: 54.00000000 W  
SFO1: 100.6278588 MHz

----- CHANNEL f2 -----  
CHRGPRG2: waltz16  
NUC2: 1H  
PCPG2: 40.00 usec  
PLW2: 12.00000000 W  
PLW12: 0.40792999 W  
PLW13: 0.26107001 W  
SFO2: 400.1516856 MHz

----- CHANNEL f3 -----  
CHRGPRG3: waltz16  
NUC3: 1H  
PCPG3: 40.00 usec  
PLW3: 12.00000000 W  
PLW13: 0.40792999 W  
PLW14: 0.26107001 W  
SFO3: 400.1516856 MHz

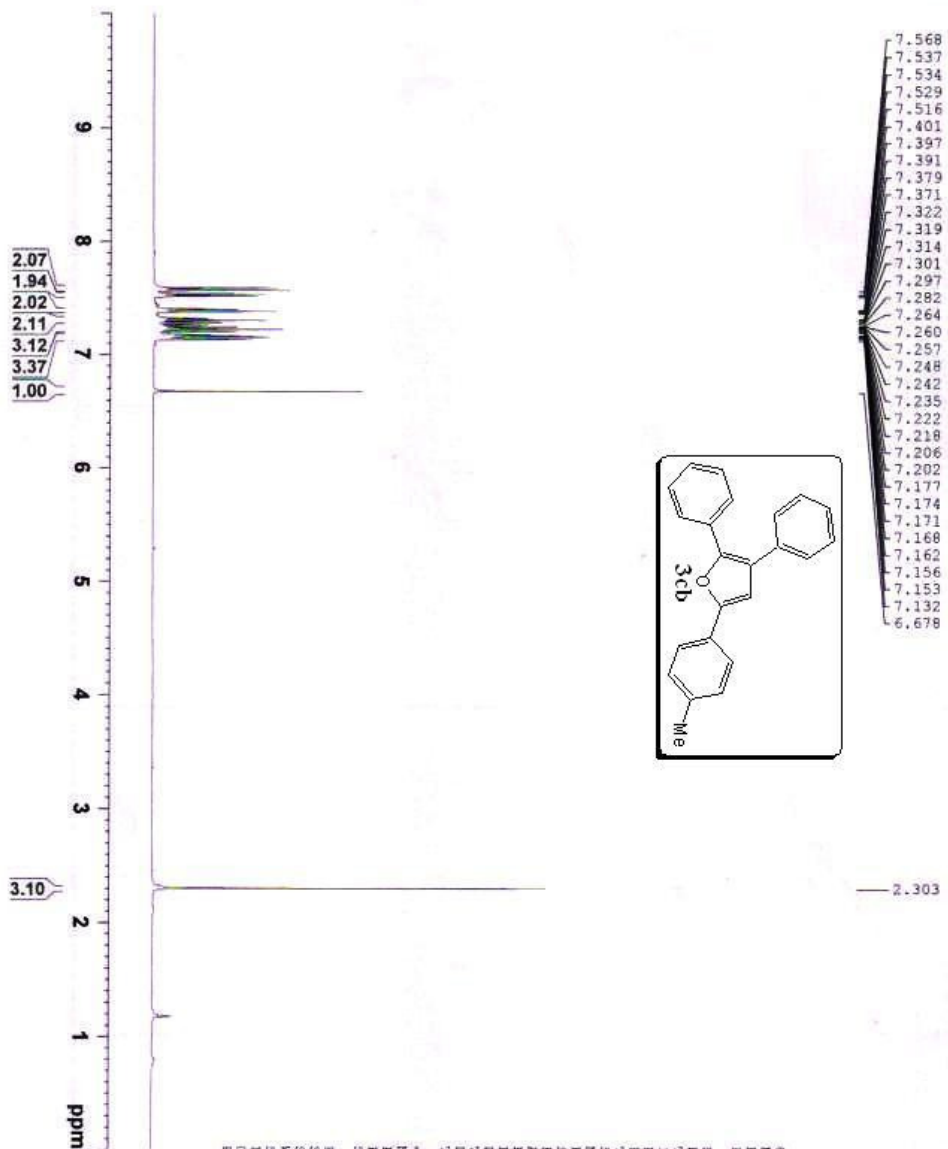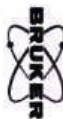

Current Data Parameters  
NAME Dr. A. HAJRA  
EXNO 41  
PROCNO 1

F2 - Acquisition Parameters

Date\_ 20130831  
Time 17.25  
INSTRUM spect  
PROBHD 5 mm PABBO BB/  
PULPROG zgpg30  
TD 32768  
SOLVENT CDCl<sub>3</sub>  
NS 32  
DS 2  
SWH 8223.685 Hz  
FIDRES 0.25067 Hz  
AQ 1.923444 sec  
RG 87.66  
WDW 60.800 usec  
DE 397.8 K  
TE 300.2 K  
TDO 1.0000000 sec  
TD0 1

===== CHANNEL F1 =====

NUC1 <sup>1</sup>H  
PI 14.75 usec  
PLW1 11.9449989 W  
SFO1 400.1524711 MHz

F2 - Processing Parameters

SI 32  
SF 400.1500455 MHz  
WDW EM  
SSB 0  
GB 0  
PC 1.00

152.94  
147.63  
137.57  
134.57  
131.34  
129.57  
128.84  
128.79  
128.52  
127.99  
127.50  
127.38  
126.21  
124.61  
123.94  
108.91

77.47  
77.16  
76.84

21.47

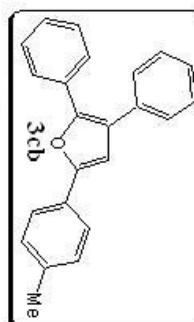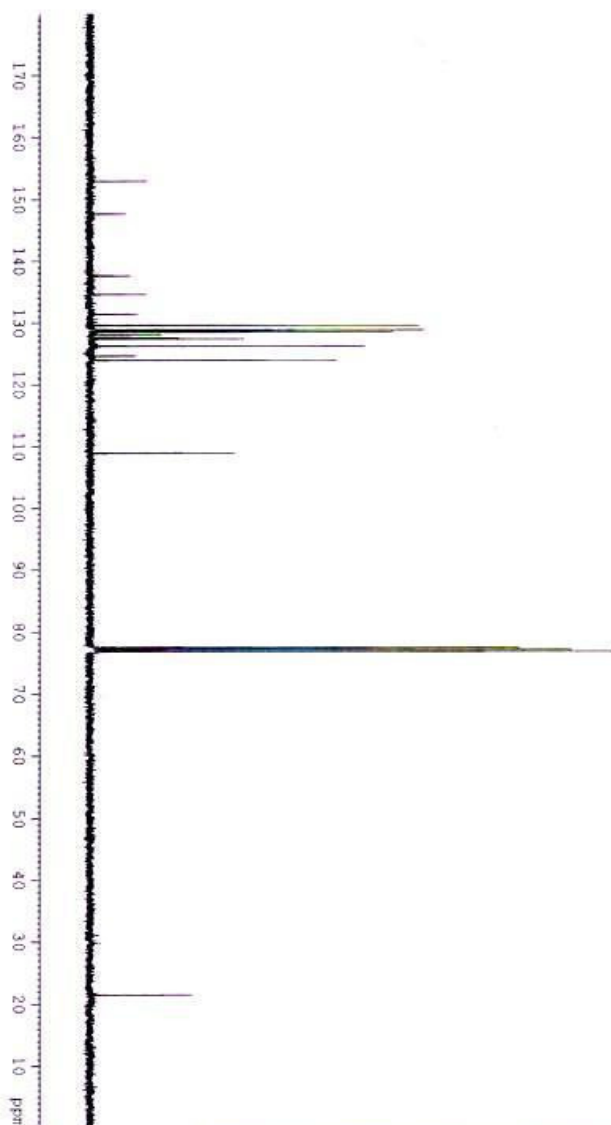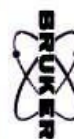

Current Data Parameters  
NAME Dr. A. Kuchta  
EXPNO 42  
PROCNO 1

F2 - Acquisition Parameters

Date\_ 20110931  
Time 17.45  
INSTRUM spect  
PROBHD 5 mm PABBO-500  
PULPROG zgpg30  
TD 65536  
SOLVENT CDCl3  
NS 400  
DS 2  
SWH 24039.463 Hz  
FIDRES 0.131526 Hz  
AQ 0.601074 sec  
RG 47.46  
WE 20.870 umsec  
DE 6.50 udec  
TE 298.2 K  
D1 2.00000000 sec  
D11 0.05000000 sec  
TD0 1

CHANNEL f1

NUC1 13C  
P1 8.99 umsec  
PL1 54.0000000 W  
SFO 100.6274588 MHz

CHANNEL f2

NUC2 1H  
PCPD2 80.00 umsec  
PLM2 12.00000000 W  
PLM12 0.40732929 W  
PLM13 0.40732929 W  
SFO2 400.146064 MHz

F2 - Processing Parameters

SI 16384  
SF 100.617850 MHz  
WDW EM  
SSB 0  
GB 0  
PC 1.40



7.723  
7.719  
7.707  
7.702  
7.640  
7.636  
7.616  
7.500  
7.496  
7.479  
7.476  
7.471  
7.451  
7.438  
7.433  
7.429  
7.422  
7.405  
7.401  
7.385  
7.382  
7.374  
7.367  
7.344  
7.325  
7.311  
7.308  
7.290  
7.282  
7.272  
6.832

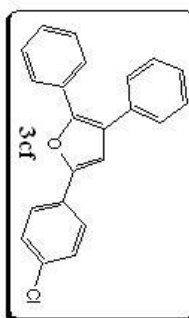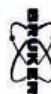

Current Data Parameters  
NAME Dr. A HAJRA 1  
EXPNO 60  
PROCNO 1

F2 - Acquisition Parameters  
Date\_ 20130807  
Time 12:47  
INSTRUM spect  
PROBHD 5 mm PABO BB/  
PULPROG zgpg30  
TD 32768  
SOLVENT CDCl3  
NS 24  
DS 2  
SWH 8223.685 Hz  
FIDRES 0.250967 Hz  
AQ 0.023444 sec  
RG 77.545  
BQ 1.992444 sec  
DQ 60.800 usec  
DE 6.50 usec  
TE 296.2 K  
D1 1.00000000 sec  
TD0 1

===== CHANNEL f1 =====  
NUC1 1H  
P1 14.75 usec  
PL1 0.00000000  
SFO1 400.1524711 MHz

F2 - Processing parameters  
SI 16384  
SF 400.1500000 MHz  
WDW EM  
SSB 0  
LB 0.30 Hz  
GB 0  
PC 1.00

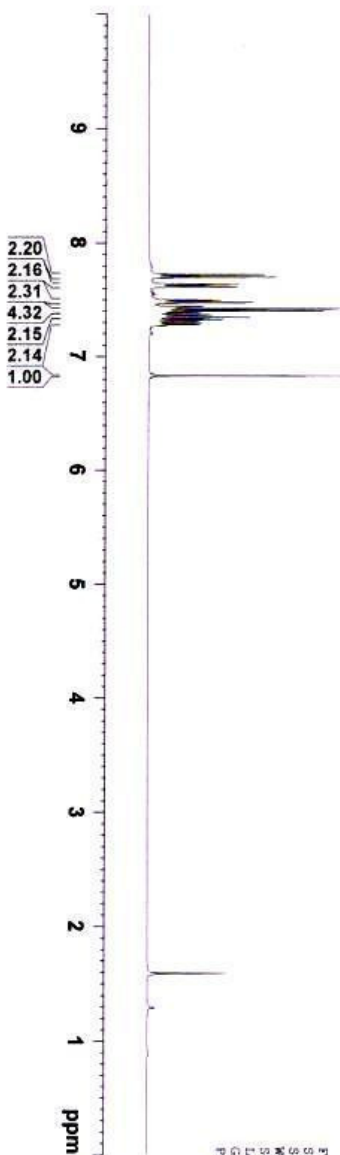

151.61  
148.35  
134.20  
133.28  
131.03  
129.16  
129.11  
128.85  
128.81  
128.58  
127.82  
127.55  
126.30  
125.13  
124.74  
110.02

77.48  
77.16  
76.85

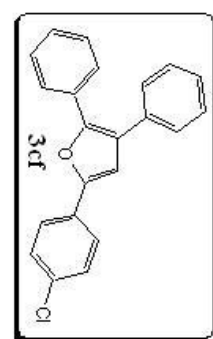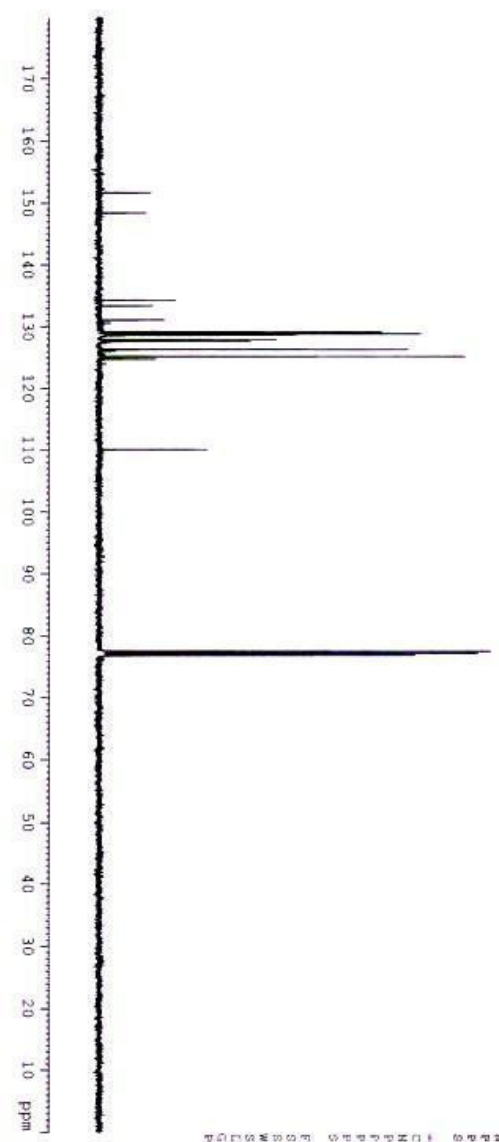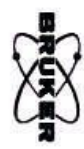

Current Data Parameters  
NAME: Dr. A. ULTRA 1  
EXPNO: #1  
PROCNO: 1  
F2 - Acquisition Parameters  
Date\_ : 20100904  
Time : 16.38  
INSTRUM : spect  
PROBHD : 5 mm PABBO BB/  
PULPROG : zgpg30  
TD : 32768  
SOLVENT : CDCl3  
NS : 640  
DS : 4  
SWH : 24038.461 Hz  
FIDRES : 0.733296 Hz  
AQ : 0.6816244 sec  
RG : 67.8  
DM : 20.000 usec  
DE : 67.8  
TE : 297.2 K  
D1 : 2.00000000 sec  
D11 : 0.03000000 sec  
TD0 : 1  
----- CHANNEL f1 -----  
NUC1 : 13C  
P1 : 1.00 usec  
PL1 : 0.00 dB  
SFO1 : 100.6279958 MHz  
----- CHANNEL f2 -----  
CROSSP2 : water76  
NUC2 : 1H  
P2 : 0.00000000 usec  
PL2 : 12.00000000 dB  
PL12 : 0.40792999 M  
PL13 : 0.26107001 M  
SFO2 : 400.1516006 MHz  
F2 - Processing parameters  
SI : 32768  
SF : 100.6177651 MHz  
WDW : EM  
SSB : 0  
LB : 1.00 Hz  
GB : 0  
PC : 1.40

7.738  
7.735  
7.730  
7.716  
7.714  
7.574  
7.556  
7.410  
7.405  
7.391  
7.375  
7.371  
7.271  
7.267  
7.265  
7.252  
7.250  
7.233  
7.231  
7.201  
7.200  
7.183  
7.140  
7.137  
7.122  
7.118  
7.103  
7.100  
6.626

3.014  
2.994  
2.974  
2.793  
2.772  
2.753

1.554

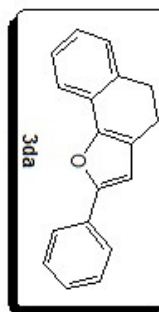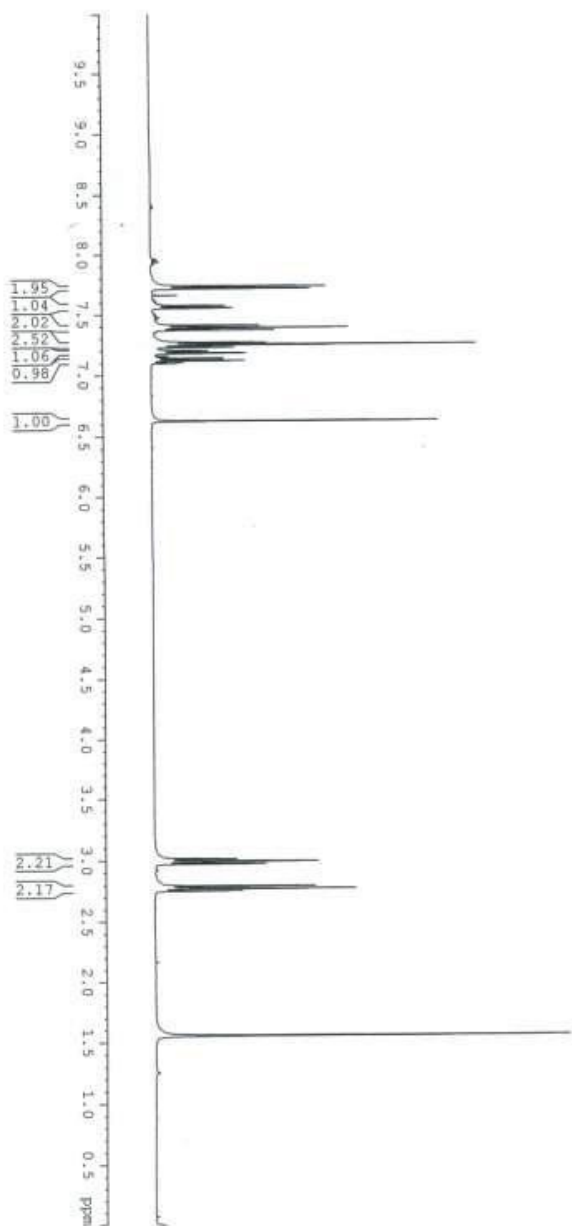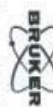

Current Data Parameters  
NAME Dr. A. HUBER 2014  
EXPNO 879  
PROCNO 1

F2 - Acquisition Parameters  
Date\_ 20140909  
Time 17:57  
INSTRUM spect  
PROBHD 5 mm PABBO BBI  
PULPROG zg30  
TD 32768  
FIDRES 1.992344 sec  
RG 168.31  
SOLVENT CDCl3  
NS 32  
DS 2  
SWH 8223.685 Hz  
FIDRES 0.250967 Hz  
AQ 1.992344 sec  
RG 168.31  
LW 60.800 usec  
DE 6.50 usec  
TE 298.2 K  
D1 1.00000000 sec  
TD0 1

===== CHANNEL f1 =====  
NUC1 1H  
P1 14.75 usec  
PLW1 11.99499889 W  
SFO1 400.1524711 MHz  
F2 - Processing Parameters  
SI 16384  
SF 400.150016 MHz  
WDW EM  
SSB 0  
LB 0.30 Hz  
GB 0  
PC 1.00

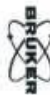

Current Data Parameters  
NAME: DF\_A\_HAURA\_2014  
EXPNO: 880  
PROCNO: 1

F2 - Acquisition Parameters  
Date\_ : 20140909  
Time : 18.19  
INSTRUM : spect  
PROBHD : 5 mm PABBO  
PULPROG : zgpg30  
TD : 32768  
SOLVENT : CDCl3  
NS : 640  
DS : 2  
SWH : 34038.461 Hz  
FIDRES : 0.733596 Hz  
AQ : 0.6816244 sec  
RG : 87.66  
DM : 20.800 usec  
DE : 39.20 usec  
TE : 300.2 K  
D1 : 2.00000000 sec  
D11 : 0.03000000 sec  
TD0 : 1

CHANNEL f1  
NUC1 : 13C  
P1 : 8.90 usec  
PL1 : 54.00000000 W  
SFO1 : 100.6278589 MHz

CHANNEL f2  
CPDPRG2 : waltz16  
NUC2 : 1H  
PCPD2 : 80.00 usec  
PLM2 : 12.00000000 W  
PLM12 : 0.40792999 W  
PLM13 : 0.26107001 W  
SFO2 : 400.1516906 MHz

F2 - Processing parameters  
SI : 16384  
SF : 100.6177836 MHz  
RGW : EM  
SOS : 0  
GB : 1.00 Hz  
PC : 1.40

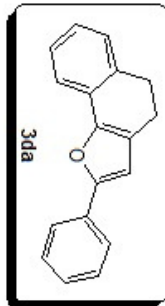

- 153.34
- 149.84
- 134.82
- 131.14
- 128.82
- 128.12
- 128.07
- 127.29
- 126.90
- 126.50
- 123.75
- 121.62
- 119.29
- 106.69
- 77.47
- 77.16
- 76.84
- 29.17
- 21.17

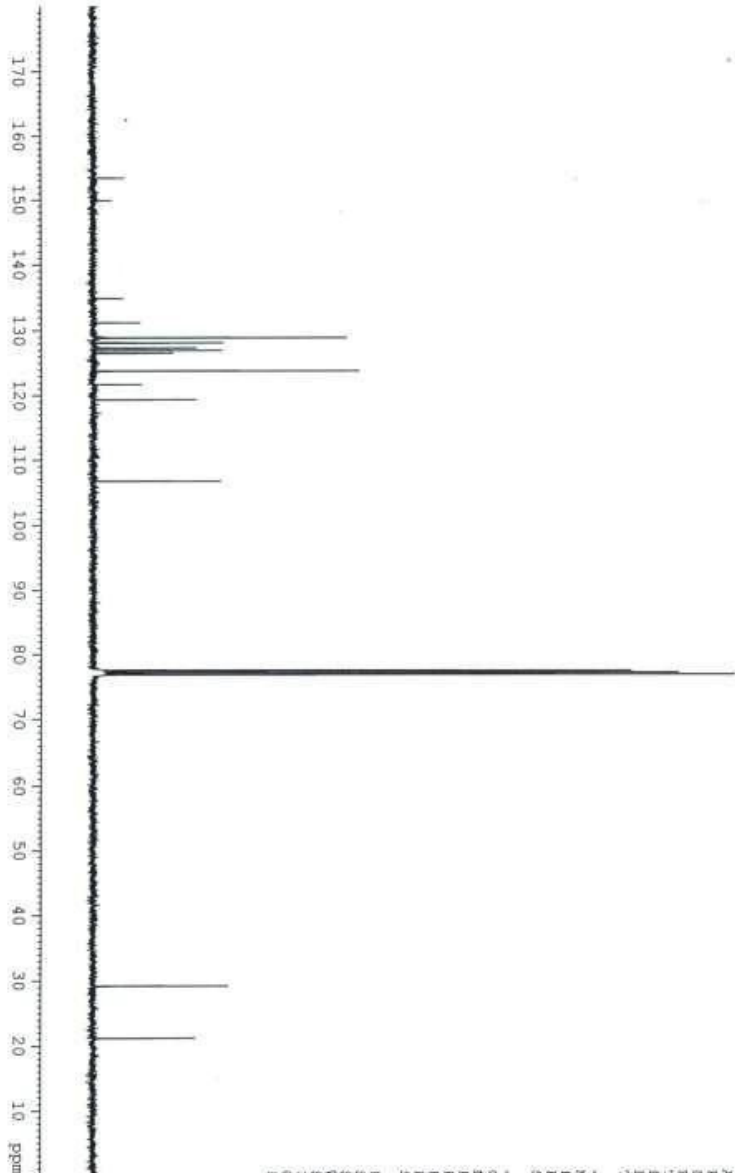

7.620  
7.617  
7.613  
7.599  
7.597  
7.356  
7.352  
7.337  
7.321  
7.317  
7.255  
7.209  
7.199  
7.190  
7.174  
7.172  
7.169  
6.464

2.673  
2.669  
2.658  
2.654  
2.646  
2.642  
2.638  
2.474  
2.470  
2.466  
2.459  
2.455  
2.451  
2.444  
2.440  
2.436  
1.885  
1.877  
1.869  
1.863  
1.853  
1.848  
1.838  
1.833  
1.778  
1.773  
1.763  
1.758  
1.748  
1.742  
1.735  
1.727

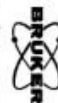

Current Data Parameters  
NAME Dr. A HAJRA 2014  
EXPNO 840  
PROCNO 1

F2 - Acquisition Parameters  
Date\_ 20140906  
Time 17.03

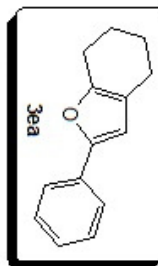

INSTRUM 5 mm PABBO BBI  
PROBHD 5 mm PABBO BBI  
PULPROG zg30  
TD 32768  
SOLVENT CDCl3  
DS 32  
SWH 8223.685 Hz  
FIDRES 0.250967 Hz  
AQ 1.9923444 sec  
RG 87.66  
DE 60.800 usec  
TE 295.9 K  
D1 1.0000000 sec  
TD0 1

CHANNEL f1 1H  
NUC1 1H  
P1 14.75 usec  
PL1 11.9949989 W  
SFO1 400.1524711 MHz

F2 - Processing parameters  
SI 32  
SF 400.1500110 MHz  
WDW EM  
SSB 0  
LB 0.30 Hz  
GB 0  
PC 1.00

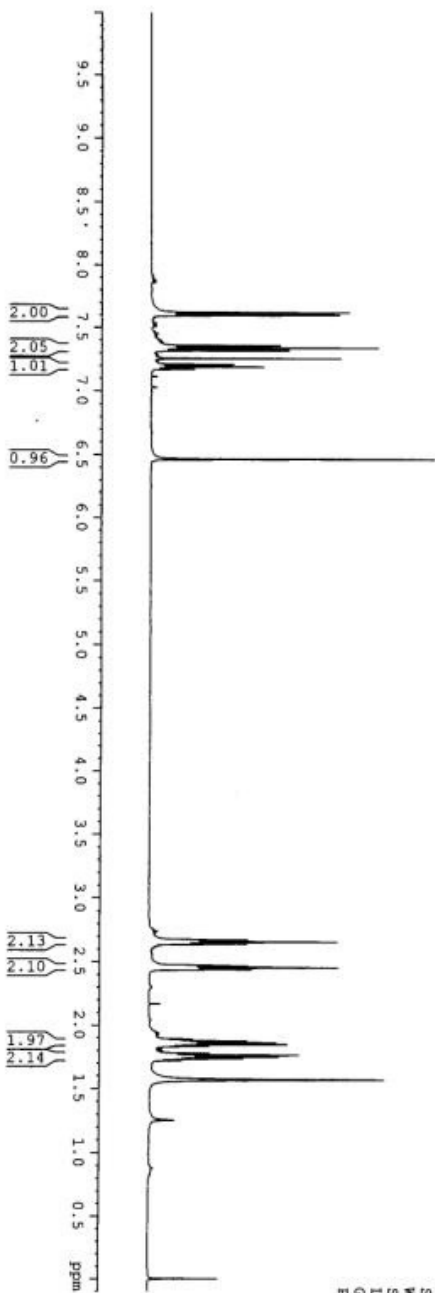

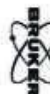

Current Data Parameters  
NAME Dr. A. BARKER  
EXPNO 641  
PROCNO 1

F2 - Acquisition Parameters

Date\_ 20140906  
Time 17.41  
INSTRUM spect  
PROBHD 5 mm BBO BB/  
PULPROG zgpg30  
TD 32768  
SOLVENT CDCl3  
NS 800  
DS 2  
SWH 24036.447 Hz  
FIDRES 0.733564 Hz  
AQ 0.6816244 sec  
RG 87.66  
DM 20,800 usec  
DE 6.50 usec  
TE 297.2 K  
D1 2.00000000 sec  
D11 0.03000000 sec  
TD0 1

CHANNEL f1  
NUC1 13C  
P1 8.90 usec  
PL1 0.00000000 W  
SFO1 100.6278566 MHz

CHANNEL f2  
CPDPRG2 waltz16  
NUC2 1H  
PCPD2 80.00 usec  
PLM2 12.00000000 W  
PLM12 0.40792999 W  
PLM13 0.26107001 W  
SFO2 400.1516006 MHz

F2 - Processing parameters  
SI 16384  
SF 100.6177836 MHz  
SFO 100.6177836 MHz  
GB 0  
PC 1.40

151.73  
150.95

131.58  
128.69  
126.69  
123.38  
119.13

106.15

77.48  
77.16  
76.84

23.44  
23.28  
23.24  
22.29

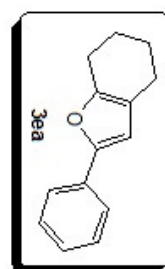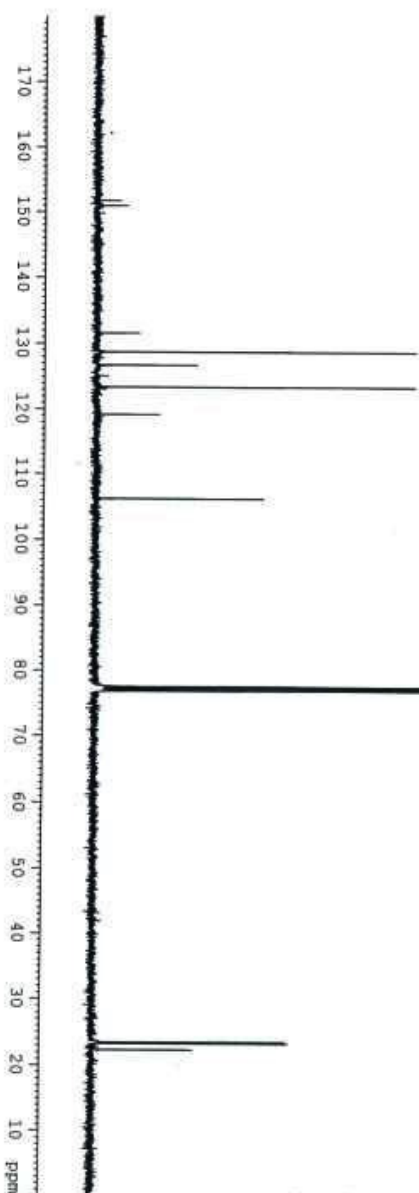

7.629  
7.626  
7.622  
7.608  
7.606  
7.356  
7.352  
7.338  
7.321  
7.317  
7.247  
7.207  
7.205  
7.202  
7.186  
7.171  
7.168  
7.165  
6.468

2.686  
2.669  
2.653  
2.421  
2.405  
2.388  
1.829  
1.813  
1.807  
1.800  
1.790  
1.784  
1.768  
1.691  
1.674  
1.662  
1.645  
1.629  
1.366  
1.359  
1.331  
1.321  
1.271  
1.258  
1.251  
1.241

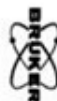

Current Data Parameters  
NAME Dr. A. HAJRA 2014  
EXPNO 847  
PROCNO 1

F2 - Acquisition Parameters  
Date\_ 20140906  
Time 20.03  
INSTRUM spect  
PROBHD 5 mm PABBO BB/  
PULPROG zg30  
TD 32768  
SOLVENT CDCl3  
NS 24  
DS 2  
SWH 8233.685 Hz  
FIDRES 0.250867 Hz  
AQ 1.9923444 sec  
RG 62.69  
DM 60.800 usec  
DE 6.50 usec  
TE 296.2 K  
D1 1.00000000 sec  
TD0 1

===== CHANNEL f1 =====  
NUC1 1H  
P1 14.75 usec  
PL1 11.9949989 W  
SFO1 400.1524711 MHz  
  
F2 - Processing parameters  
SI 16384  
SF 400.1500139 MHz  
WDW EM  
SSB 0  
LB 0.30 Hz  
GB 0  
PC 1.00

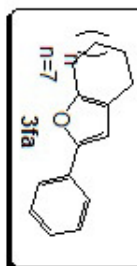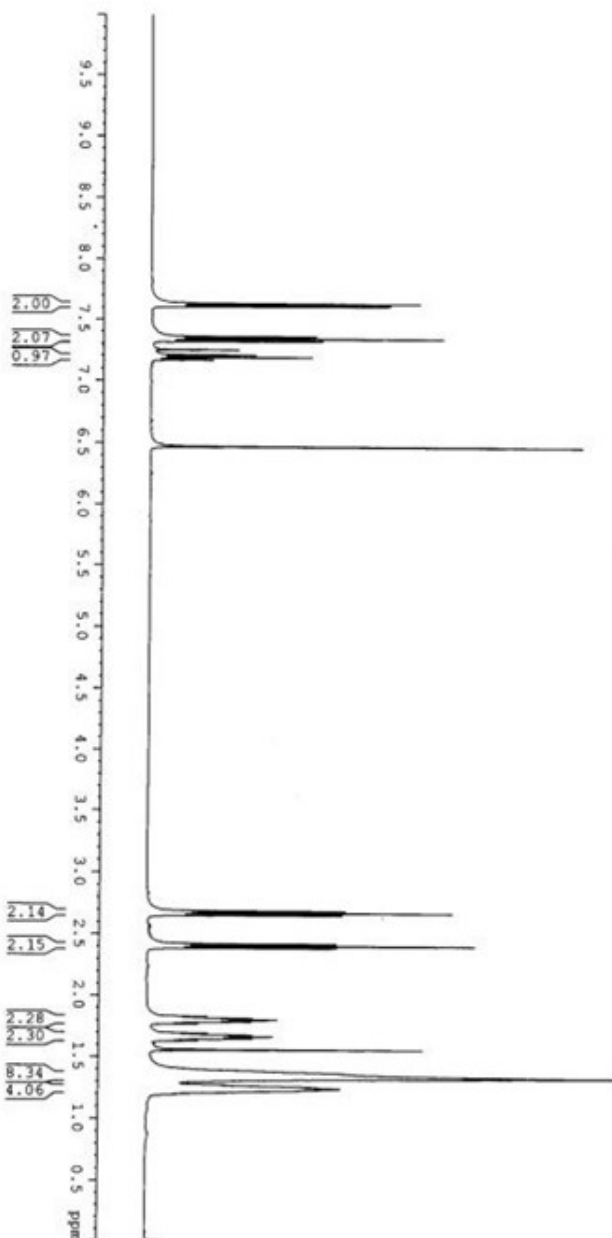

151.63  
151.37

131.51  
128.66  
126.67  
123.36  
121.98

106.64

77.47  
77.16  
76.84

27.77  
26.36  
24.94  
24.83  
24.58  
24.48  
23.02  
22.49  
22.30  
21.68

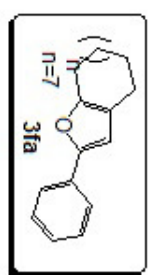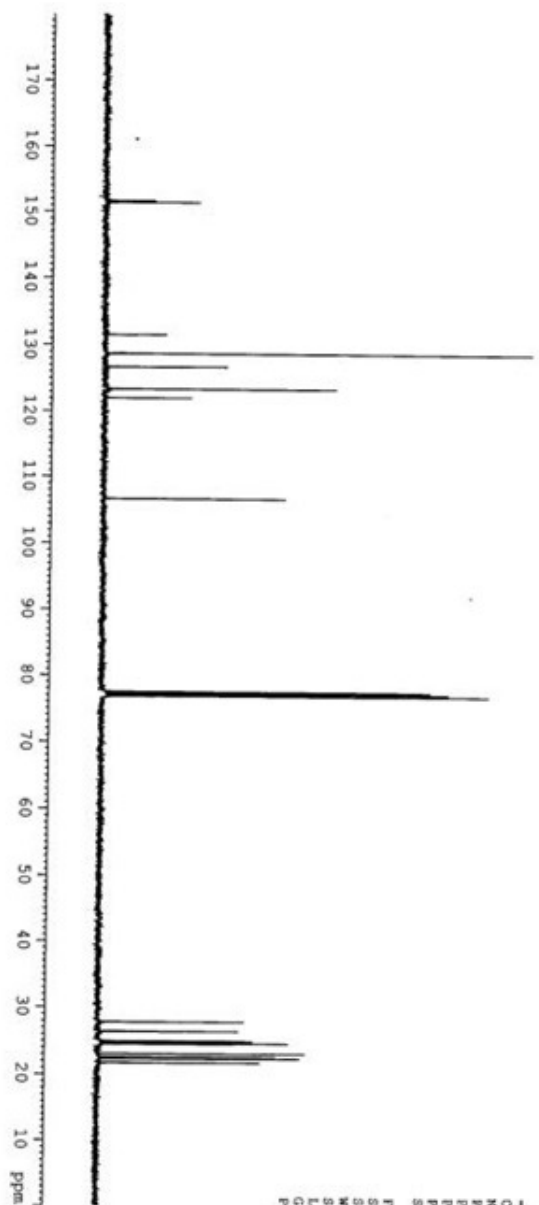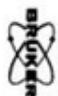

Current Data Parameters  
NAME Dr. A. MATVA 2014  
EXPNO 848  
PROCNO 1

F2 - Acquisition Parameters  
Date\_ 20140906  
Time 20:47  
INSTRUM spect  
PROBHD 5 mm PABBO BB/  
PULPROG zgpg30  
TD 32768  
SOLVENT CDCl3  
NS 512  
DS 2  
SWH 24038.461 Hz  
FIDRES 0.733596 Hz  
AQ 0.6816244 sec  
RG 62.69  
EW 20.800 usec  
DE 8.50 usec  
TE 297.2 K  
D11 2.0000000 sec  
D11 0.0300000 sec  
TD0 1

===== CHANNEL f1 =====  
NUC1 <sup>13</sup>C  
P1 8.90 usec  
PLM1 54.0000000 W  
SFO1 100.6278588 MHz

===== CHANNEL f2 =====  
CROSSPO2 waltz16  
NUC2 <sup>1</sup>H  
PCPD2 1W  
PLM2 12.0000000 W  
PLM2 0.4079298 W  
PLM3 0.2610701 W  
SFO2 400.1516096 MHz

F2 - Processing parameters  
SI 16384  
SF 100.617851 MHz  
WDW EM  
SSB 0  
LB 1.00 Hz  
GB 0  
PC 1.40
